1 **A Novel Nasal Brush-based Classifier of Asthma Identified by Machine Learning Analysis**  
2 **of Nasal RNA Sequence Data**

3

4 **Authors:** Gaurav Pandey<sup>1</sup>, Om P. Pandey<sup>1</sup>, Angela J. Rogers<sup>2</sup>, Gabriel E. Hoffman<sup>1</sup>, Benjamin  
5 A. Raby<sup>3</sup>, Scott T. Weiss<sup>3</sup>, Eric E. Schadt<sup>1</sup>, Supinda Bunyavanich<sup>1,4\*</sup>

6

7 **Affiliations:**

8 <sup>1</sup> Icahn Institute for Genomics and Multiscale Biology and Department of Genetics and Genomic  
9 Sciences, Icahn School of Medicine at Mount Sinai, New York, NY, USA.

10 <sup>2</sup> Division of Pulmonary and Critical Care Medicine, Department of Medicine, Stanford University  
11 School of Medicine, Stanford, CA, USA.

12 <sup>3</sup> Channing Division of Network Medicine and Division of Pulmonary and Critical Care Medicine,  
13 Brigham & Women's Hospital, and Harvard Medical School, Boston, MA, USA.

14 <sup>4</sup> Division of Allergy & Immunology, Department of Pediatrics, Icahn School of Medicine at Mount  
15 Sinai, New York, NY, USA.

16

17 \*To whom correspondence should be addressed: Supinda Bunyavanich, MD, MPH, Icahn  
18 School of Medicine at Mount Sinai, 1425 Madison Avenue #1498, New York, NY 10029, USA,  
19 Tel. +1 212 659 8262, Fax +1 212 426 1902, [supinda@post.harvard.edu](mailto:supinda@post.harvard.edu)

20 **ABSTRACT:**

21 Asthma is a common, under-diagnosed disease affecting all ages. We sought to identify a nasal  
22 brush-based classifier of mild/moderate asthma. One hundred ninety subjects with  
23 mild/moderate asthma and controls underwent nasal brushing and RNA sequencing of nasal  
24 samples. A machine learning-based pipeline, comprised of feature selection, classification, and  
25 statistical analyses, identified a diagnostic classifier of asthma consisting of 90 nasally  
26 expressed genes interpreted via an L2-regularized logistic regression classification model. This  
27 nasal brush-based classifier performed with strong predictive value and sensitivity across eight  
28 validation test sets, including (1) a test set of independent asthmatic and non-asthmatic subjects  
29 profiled by RNA sequencing (positive and negative predictive values of 1.00 and 0.96,  
30 respectively; AUC of 0.994), (2) two independent case-control cohorts of asthma profiled by  
31 microarray, and (3) five independent cohorts of subjects with other respiratory conditions  
32 (allergic rhinitis, upper respiratory infection, cystic fibrosis, smoking), where the panel had a low  
33 to zero rate of misclassification. Translational development of this classifier into a diagnostic  
34 nasal brush-based biomarker for clinical use could aid in asthma detection and care.

## 35 **Introduction**

36           Asthma is a chronic respiratory disease that affects 8.6% of children and 7.4% of adults  
37 in the United States [1]. Its true prevalence may be higher. The fluctuating airflow obstruction,  
38 bronchial hyper-responsiveness, and airway inflammation that characterize mild to moderate  
39 asthma can be difficult to detect in busy, routine clinical settings [2]. In one study of US middle  
40 school children, 11% reported physician-diagnosed asthma with current symptoms, while an  
41 additional 17% reported active asthma-like symptoms without a diagnosis of asthma [3].  
42 Undiagnosed asthma leads to missed school and work, restricted activity, emergency  
43 department visits, and hospitalizations [3, 4]. Given the high prevalence of asthma and  
44 consequences of missed diagnosis, there is high potential impact of improved diagnostic tools  
45 for asthma [5].

46           National and international guidelines recommend that the diagnosis of asthma should be  
47 based on a history of typical symptoms *and objective findings* of variable expiratory airflow  
48 limitation [6, 7]. However, obtaining such objective findings can be challenging given currently  
49 available tools. Pulmonary function tests (PFTs) require equipment, expertise, and experience  
50 to execute well [8, 9]. Many individuals have difficulty with PFTs because they require  
51 coordinated breaths into a device. Results are unreliable if the procedure is done with poor  
52 technique [8]. Further, PFTs are usually not immediately available in primary care settings.  
53 Despite guidelines recommending objective tests such as PFTs to assess possible asthma,  
54 PFTs are not done in over half of patients suspected of having asthma [8]. Induced sputum and  
55 exhaled nitric oxide have been explored as asthma biomarkers, but their implementation  
56 requires technical expertise and does not yield better clinical results than physician-guided  
57 management alone [10]. Given the above, the reality is that most asthma is still clinically  
58 diagnosed and managed based on self-report [8, 9]. This is suboptimal for mild/moderate  
59 asthma given its waxing/waning nature, and because self-reported symptoms and medication  
60 use are biased [11].

61 A nasal biomarker of asthma is of high interest given the accessibility of the nose and  
62 shared airway biology between the upper and lower respiratory tracts [12-15]. The easily  
63 accessible nasal passages are directly connected to the lungs and exposed to common  
64 environmental and microbial factors. In this study, we applied next-generation sequencing and  
65 machine learning to identify a novel nasal brush-based classifier of asthma (**Figure 1**).  
66 Specifically, we used RNA sequencing (RNAseq) to comprehensively profile gene expression  
67 from nasal brushings collected from subjects with mild to moderate asthma and controls,  
68 creating the largest nasal RNAseq data set in asthma to date. Using a robust machine learning-  
69 based pipeline comprised of feature selection [16], classification [17], and statistical analyses  
70 [18], we identified an asthma gene panel that accurately differentiates subjects with and without  
71 mild-moderate asthma. This pipeline was designed with a systems biology-based perspective  
72 that many genes, even ones with marginal effects, can collectively classify phenotypes (here  
73 asthma) more accurately than individual genes [19].

74 We validated this asthma gene panel on eight test sets of independent subjects with  
75 asthma and other respiratory conditions, finding that it performed with high accuracy, sensitivity,  
76 and specificity. As the study of nasal transcriptomics in asthma has been marked by small  
77 studies thus far, our relatively large study importantly adds RNAseq data to the field while also  
78 leveraging smaller existing data sets for external validation. We see our identification of a  
79 diagnostic nasal brush-based classifier of asthma as the first step in the development of  
80 minimally invasive, nasal biomarkers for asthma care, with translational development for clinical  
81 implementation to follow next. As with any disease, the first step is to accurately identify affected  
82 patients, and a next phase of research will be to develop nasal biomarkers to predict treatment  
83 response.

84

## 85 **Results**

86 *Study population and baseline characteristics*

87 We performed nasal brushing on 190 subjects for this study, including 66 subjects with  
88 well-defined mild to moderate persistent asthma (based on symptoms, medication need, and  
89 demonstrated airway hyper-responsiveness by methacholine challenge) and 124 subjects  
90 without asthma (based on no personal or family history of asthma, normal spirometry, and no  
91 bronchodilator response). The definitional criteria we used for mild-moderate asthma are  
92 consistent with US National Heart Lung Blood Institute guidelines for the diagnosis of asthma  
93 [7], and are the same criteria used in the longest NIH-sponsored study of mild-moderate asthma  
94 [20, 21].

95 From these 190 subjects, a random selection of 150 subjects were *a priori* assigned as  
96 the development set (to be used for asthma classifier development), and the remaining 40  
97 subjects were *a priori* assigned as the RNAseq test set (to be used as one of 8 validation test  
98 sets for testing of the asthma classifier identified from the development set).

99 The baseline characteristics of the subjects in the development set (n=150) are shown in  
100 the left section of **Table 1**. The mean age of subjects with asthma was somewhat lower than  
101 subjects without asthma, with slightly more male subjects with asthma and more female  
102 subjects without asthma. Caucasians were more prevalent in subjects without asthma, which  
103 was expected based on the inclusion criteria. Consistent with reversible airway obstruction that  
104 characterizes asthma [2], subjects with asthma had significantly greater bronchodilator  
105 response than control subjects (T-test  $P = 1.4 \times 10^{-5}$ ). Allergic rhinitis was more prevalent in  
106 subjects with asthma (Fisher's exact test  $P = 0.005$ ), consistent with known comorbidity  
107 between allergic rhinitis and asthma [22]. Rates of smoking between subjects with and without  
108 asthma were not significantly different.

109 RNA isolated from nasal brushings from the subjects was of good quality, with mean RIN  
110 7.8 ( $\pm 1.1$ ). The median number of paired-end reads per sample from RNA sequencing was 36.3  
111 million. Following pre-processing (normalization and filtering) of the raw RNAseq data, 11,587  
112 genes were used for statistical and machine learning analysis. VariancePartition analysis [23],

113 which is designed to analyze the contribution of technical and biological factors to variation in  
114 gene expression, showed that age, race, and sex contributed minimally to total gene expression  
115 variance (**Supplementary Figure 1**). For this reason, we did not adjust the pre-processed  
116 RNAseq data for these factors.

117 Differential gene expression analysis by DeSeq2 [24] showed that 1613 and 1259 genes  
118 were respectively over- and under-expressed in asthma cases versus controls (false discovery  
119 rate (FDR)  $\leq 0.05$ ) (**Supplementary Table 1**). These genes were enriched for disease-relevant  
120 pathways in the Molecular Signature Database [25], including immune system (fold change=3.6,  
121 FDR= $1.07 \times 10^{-22}$ ), adaptive immune system (fold change=3.91, FDR= $1.46 \times 10^{-15}$ ), and innate  
122 immune system (fold change=4.1, FDR= $4.47 \times 10^{-9}$ ) (**Supplementary Table 1**).

123

#### 124 *Identifying a nasal brush-based classifier to predict asthma status*

125 To identify a nasal brush-based classifier that accurately predicts asthma status using  
126 the RNAseq data generated, we developed a rigorous machine learning pipeline that combined  
127 feature (gene) selection [16] and classification techniques [17] that was applied to the  
128 development set (**Materials and Methods** and **Supplementary Figure 2**). This pipeline was  
129 designed with a systems biology-based perspective that many genes, even ones with marginal  
130 effects, can collectively classify phenotypes (here asthma) more accurately than individual  
131 genes. Each gene expression trait can be evaluated on its own or in combination with other  
132 gene expression traits to assess how well it distinguishes asthma cases from controls (a  
133 process referred to as feature selection). Once the most predictive gene expression traits  
134 (features) are identified, various machine learning algorithms can be applied to build a classifier  
135 that is optimized to predict asthma status as accurately as possible given the data (a process  
136 referred to as classification analysis).

137 Feature selection in our pipeline involved a cross validation-based protocol [26] using  
138 the well-established Recursive Feature Elimination (RFE) algorithm [16] combined with  $L_2$ -

139 regularized Logistic Regression (LR or Logistic) and Support Vector Machine (SVM-Linear  
140 (kernel)) algorithms [17] (combinations referred to as LR-RFE and SVM-RFE respectively)  
141 **(Supplementary Figure 3)**. Classification analysis was then performed by applying four global  
142 classification algorithms (SVM-Linear, AdaBoost, Random Forest, and Logistic) [17] to the  
143 expression profiles of the gene sets identified by feature selection. To reduce the potential  
144 adverse effect of overfitting, this process (feature selection and classification) was repeated 100  
145 times on 100 random splits of the development set into training and holdout sets. The final  
146 classifier was selected by statistically comparing the models in terms of both classification  
147 performance and parsimony, i.e., the number of genes included in the model [18]  
148 **(Supplementary Figure 4)**.

149 Due to the imbalance of the two classes (asthma and controls) in our cohort (consistent  
150 with imbalances in the general population), we used F-measure as the main evaluation metric in  
151 our study [27]. This class-specific measure is a conservative mean of precision (predictive  
152 value) and recall (same as sensitivity), and is described in detail in **Box 1** and **Supplementary**  
153 **Figure 5**. F-measure can range from 0 to 1, with higher values indicating superior classification  
154 performance. An F-measure value of 0.5 does not represent a random model. To provide  
155 context for our performance assessments, we also computed commonly used evaluation  
156 measures, including positive and negative predictive values (PPVs and NPVs) and Area Under  
157 the Receiver Operating Characteristic (ROC) Curve (AUC) scores (**Box 1** and **Supplementary**  
158 **Figure 5**).

---

159  
160  
161  
162  
163  
164  
165  
166  
167  
168  
169  
170  
171  
172  
173  
174  
175  
176  
177  
178  
179  
180  
181  
182

---

### **Box 1: Evaluation measures for predictive models**

Many measures exist for evaluating the performance of classifiers. The most commonly used evaluation measures in medicine are the positive and negative predictive values (PPV and NPV respectively; **Supplementary Figure 5**), and Area Under the Receiver Operating Characteristic (ROC) Curve (AUC score) [27]. However, these measures have several limitations. PPV and NPV ignore the critical dimension of sensitivity [27]. For instance, a classifier may predict perfectly for only one asthma sample in a cohort and make no predictions for all other asthma samples. This will yield a PPV of 1, but poor sensitivity, since none of the other asthma samples were identified by the classifier. ROC curves and their AUC scores do not accurately reflect performance when the number of cases and controls in a sample are imbalanced [27], which is frequently the case in clinical studies and medical practice. For such situations, precision, recall, and F-measure (**Supplementary Figure 5**) are considered more meaningful performance measures for classifier evaluation. Note that precision for cases (e.g. asthma) is equivalent to PPV, and precision for controls (e.g. no asthma) is equivalent to NPV (**Supplementary Figure 5**). Recall is the same as sensitivity. F-measure is the harmonic (conservative) mean of precision and recall that is computed separately for each class, and thus provides a more comprehensive and reliable assessment of model performance for cohorts with unbalanced class distributions. Like PPV, NPV and AUC, F-measure ranges from 0 to 1, with higher values indicating superior classification performance, but a value of 0.5 for F-measure does not represent a random model and could in some cases indicate superior performance over random. For the above reasons, we consider F-measure as the primary evaluation measure in our study, although we also provide PPV, NPV and AUC measures for context.

---



183 The best performing and most parsimonious combination of feature selection and  
184 classification algorithm identified by our machine learning pipeline was LR-RFE & Logistic  
185 (Regression) (**Supplementary Figure 4**). The classifier inferred using this combination was built  
186 on 90 predictive genes and will be henceforth referred to as the *asthma gene panel*. We  
187 emphasize that the expression values of the panel's 90 genes must be used in combination with  
188 the Logistic classifier and the model's optimal classification threshold (i.e. predicted  
189 label=asthma if classifier's probability output $\geq$ 0.76, else predicted label=no asthma) to be used  
190 effectively for asthma classification.

191

192 *Validation of the asthma gene panel classifier in an RNAseq test set of independent subjects*

193 Our next step was to validate the asthma gene panel in an RNAseq test set of  
194 independent subjects, for which we used the test set (n=40) of nasal RNAseq data from  
195 independent subjects. The baseline characteristics of the subjects in this test set are shown in  
196 the right section of **Table 1**. Subjects in the development and test sets were generally similar,  
197 except for a lower prevalence of allergic rhinitis among those without asthma in the test set.

198 The asthma gene panel performed with high accuracy in the RNAseq test set's  
199 independent subjects, achieving AUC = 0.994 (**Figure 2**), PPV 1.00, and NPV 0.96 (**Figures 3B**  
200 **and 3D, left most bar**). In terms of the F-measure metric, the panel achieved F = 0.98 and 0.96  
201 for classifying asthma and no asthma, respectively (**Figures 3A and 3C, left most bar**). For  
202 comparison, the much lower performance of permutation-based random models is shown in  
203 **Supplementary Figure 6**.

204 Our machine learning pipeline evaluated models from several combinations of feature  
205 selection and classification algorithms to select the most predictive classifier. Potentially  
206 predictive genes can also be identified from differential expression analysis and results from  
207 prior asthma-related studies. **Figure 4** shows the performance of the asthma gene panel in the  
208 RNAseq test set relative to that of alternative classifiers trained on the development set using:

209 (1) other classifiers tested in our machine learning pipeline, (2) all genes in our data set (11587  
210 genes after filtering), (3) all differentially expressed genes in the development set (2872 genes)  
211 (**Supplementary Table 1**), (4) genes associated with asthma from prior studies[28] (70 genes)  
212 (**Supplementary Table 2**), and (5) a commonly used one-step classification model (L1-Logistic)  
213 [29] (243 genes). The asthma gene panel identified by our pipeline outperformed all these  
214 alternative classifiers despite its reliance on a small number of genes.

215 We emphasize that our panel produced more accurate predictions than models using all  
216 genes, all differentially expressed genes, and all known asthma genes. This supports that data-  
217 driven methods can build more effective classifiers than those built exclusively on traditional  
218 statistical methods (which do not necessarily target classification), and current domain  
219 knowledge (which may be incomplete and subject to investigation bias). Our panel also  
220 outperformed and was more parsimonious than the model learned using the commonly used  
221 L1-Logistic method, which combined feature selection and classification into a single step. The  
222 fact that our asthma gene panel performed well in an independent RNAseq test set while also  
223 outperforming alternative models lends confidence to the panel's classification ability.

224

#### 225 *Validation of the asthma gene panel in external asthma cohorts*

226 To assess the generalizability of our asthma gene panel for asthma classification in  
227 other populations and profiling platforms, we applied the panel to microarray-derived nasal gene  
228 expression data generated from independent cohorts of asthmatics and controls : Asthma1  
229 (GEO GSE19187)[30] and Asthma2 (GEO GSE46171)[31]. **Supplementary Table 3**  
230 summarizes the characteristics of these external, independent case-control cohorts. In general,  
231 RNAseq-based predictive models are not expected to translate well to microarray-profiled  
232 samples [32, 33]. A major reason is that gene mappings do not perfectly correspond between  
233 RNAseq and microarray due to disparities between array annotations and RNAseq gene models

234 [33]. Our goal was to assess the performance of our asthma gene panel despite discordances in  
235 study designs, sample collections, and gene expression profiling platforms.

236 The asthma gene panel performed relatively well (**Figure 3 middle bars**) and  
237 consistently better than permutation-based random models (**Supplementary Figure 6**) in  
238 classifying asthma and no asthma in both the Asthma1 and Asthma2 microarray-based test  
239 sets. The panel achieved similar F-measures in the two test sets (**Figures 3A and 3C middle**  
240 **bars**), although the PPV and NPV measures were more dissimilar for Asthma2 (PPV 0.93, NPV  
241 0.31) than for Asthma1 (PPV 0.61, NPV 0.67) (**Figure 3B and 3D middle bars**). Although the  
242 panel's performance was better than its random counterparts for both these test sets, the  
243 difference in this performance was smaller for Asthma2. This occurred partially because  
244 Asthma2 includes many more asthma cases than controls (23 vs. 5), which is counter to the  
245 expected distribution in the general population. In such a skewed data set, it is possible for a  
246 random model to yield an artificially high F-measure for asthma by predicting every sample as  
247 asthmatic. We verified that this occurred with the random models tested on Asthma2.

248 To assess how the asthma gene panel might perform in a larger external test set, we  
249 combined samples from Asthma1 and Asthma2 and performed the evaluation on this combined  
250 set. We chose this approach because no single large, external dataset of nasal gene expression  
251 in asthma exists, and combining cohorts could yield a joint test set with heterogeneity that  
252 partially reflects real-life heterogeneity of asthma. As expected, all the performance measures  
253 for this combined test set were intermediate to those for Asthma1 and Asthma2 (**Figure 3 right**  
254 **most bars**). These results supported that our panel also performs reasonably well in a larger  
255 and more heterogeneous cohort.

256 Overall, despite the discordance of gene expression profiling platforms, study designs,  
257 and sample collection methods, our asthma gene panel performed reasonably well in these  
258 external test sets, supporting a degree of generalizability of the panel across platforms and

259 cohorts. Such a translatable result is not frequently observed in genomic medicine research,  
260 especially those based on gene expression [34, 35].

261

262 *Specificity of the asthma gene panel: validation in external cohorts with non-asthma respiratory*  
263 *conditions*

264 To assess the specificity of our panel, we next sought to determine if it would misclassify  
265 as asthma other respiratory conditions with symptoms that overlap with asthma. To this end, we  
266 evaluated the performance of the asthma gene panel on nasal gene expression data derived  
267 from case-control cohorts with allergic rhinitis (GSE43523) [36], upper respiratory infection  
268 (GSE46171) [31], cystic fibrosis (GSE40445) [37], and smoking (GSE8987) [12].

269 **Supplementary Table 4** details the characteristics for these external cohorts with non-asthma  
270 respiratory conditions. In three of these five non-asthma cohorts (Allergic Rhinitis, Cystic  
271 Fibrosis and Smoking), the panel appropriately produced one-sided classifications, i.e., samples  
272 were all appropriately classified as “no asthma.” This is shown by the zero F-measure for the  
273 positive (asthma) class (**Figure 5A**) and perfect F-measure for the negative (no asthma) class  
274 (**Figure 5C**) obtained by the panel in these cohorts. In other words, the precision for the asthma  
275 class (PPV) of our panel was exactly and appropriately zero (**Figure 5B**), and NPV was  
276 perfectly 1.00 for these cohorts with non-asthma conditions (**Figures 5D**). The URI day 2 and 6  
277 cohorts were slight deviations from these trends, where the panel achieved perfect NPVs of  
278 1.00 (**Figure 5D**), but marginally lower F-measure for the “no asthma” class (**Figure 5C**) due to  
279 slightly lower than perfect sensitivity. This may have been influenced by common inflammatory  
280 pathways underlying early viral inflammation and asthma [38]. Nonetheless, consistent with the  
281 other non-asthma test sets, the panel’s misclassification of URI as asthma was rare and  
282 substantially less than its random counterpart classifiers (**Supplementary Figure 7**).

283 To assess the asthma gene panel’s performance if presented with a large,  
284 heterogeneous collection of non-asthma respiratory conditions reflective of real clinical settings,

285 we aggregated the non-asthma cohorts into a “Combined non-asthma” test set and applied the  
286 asthma gene panel. The results included an appropriately zero F-measure for asthma and zero  
287 PPV, and F-measure 0.97 for no asthma and NPV 1.00 (**Figure 5, right most bars**). Results  
288 from the individual and combined non-asthma test sets collectively support that the asthma  
289 gene panel would rarely misclassify other respiratory diseases as asthma.

290

### 291 *Statistical and Pathway Examination of Genes in the Asthma Gene Panel*

292 An interesting question to ask for a disease classification panel is how does its predictive  
293 ability relate to the individual differential expression status of the genes constituting the panel?

294 We found that 46 of the 90 genes included in our panel were differentially expressed (FDR  
295  $\leq 0.05$ ), with 22 and 24 genes over- and under-expressed in asthma respectively (**Figure 6,**  
296 **Supplementary Table 1**). More generally, the genes in our panel had lower differential  
297 expression FDR values than other genes (Kolmogorov-Smirnov statistic=0.289, P-  
298 value= $2.73 \times 10^{-37}$ ) (**Supplementary Figure 8**).

299 In terms of biological function, pathway enrichment analysis of our panel’s 90 genes,  
300 though statistically limited by the small number of genes, yielded enrichment for pathways  
301 including defense response (fold change=2.86, FDR=0.006) and response to external stimulus  
302 (fold change=2.50, FDR=0.012). Only four (*C3*, *DEFB1*, *CYFIP2* and *GSTT1*) of the 90 genes  
303 are known asthma genes and are functionally involved in complement activation, microbicidal  
304 activity, T-cell differentiation, and oxidative stress, respectively [28]. These results suggest that  
305 our machine learning pipeline was able to extract information beyond individually differentially  
306 expressed or previously known asthma genes, allowing for the identification of a parsimonious  
307 panel of genes that collectively enabled accurate asthma classification.

308 **Discussion**

309 We identified a panel of genes expressed in nasal brushings that accurately classifies  
310 subjects with mild/moderate asthma from controls. This nasal brush-based panel, consisting of  
311 the expression profiles of 90 genes interpreted via a logistic regression classification model,  
312 performed with high precision (PPV=1.00 and NPV=0.96) and recall for classifying asthma  
313 (AUC=0.994). The performance of the asthma gene panel across independent asthma test sets  
314 demonstrates the generalizability of the panel across study populations and two major  
315 modalities of gene expression profiling (RNAseq and microarray). Additionally, the panel's low  
316 to zero rate of misclassification on external cohorts with non-asthma respiratory conditions  
317 supported the specificity of this panel.

318 Our nasal brush-based asthma gene panel is based on the common biology of the upper  
319 and lower airway, a concept supported by clinical practice and previous findings [12-15].  
320 Clinically, we rely on the united airway by screening for lower airway infections (e.g. influenza,  
321 methicillin-resistant *Staphylococcus aureus*) with nasal swabs [39]. Sridhar et al. found that  
322 gene expression consequences of tobacco smoking in bronchial epithelial cells were reflected in  
323 nasal epithelium [12]. Wagener et al. compared gene expression in the nasal and bronchial  
324 epithelia from 17 subjects, finding that 99% of the 33,000 genes tested exhibited no differential  
325 expression between the nasal and bronchial epithelia in those with airway disease [13]. In a  
326 study of 30 children, Guajardo et al. identified gene clusters with differential expression in nasal  
327 epithelium between subjects with exacerbated asthma vs. controls [14]. The above studies were  
328 done with small sample sizes and microarray technology. More recently, Poole et al. compared  
329 RNAseq profiles of nasal brushings from 10 asthmatic and 10 control subjects to publicly  
330 available bronchial transcriptional data, finding correlation ( $\rho = 0.87$ ) between nasal and  
331 bronchial transcripts, as well as correlation ( $\rho=0.77$ ) between nasal differential expression and  
332 previously observed bronchial differential expression in asthmatics [15]. To our knowledge, our

333 study has generated the largest nasal RNAseq data set in asthma to date and is the first to  
334 identify a nasal brush-based classifier of asthma.

335         Although based on only 90 genes, our asthma gene panel classified asthma with greater  
336 accuracy than models based on all genes, all differentially expressed genes, and known asthma  
337 genes (**Figure 4**). Its superior performance supports that our machine learning pipeline  
338 successfully selected a parsimonious set of informative genes that (1) captures more actionable  
339 knowledge than traditional differential expression and genetic association analyses, and (2) cuts  
340 through the potential noise of genes irrelevant to asthma. These results show that data-driven  
341 methods can build more effective classifiers than those built exclusively on current domain  
342 knowledge. About half the genes in our asthma gene panel were not differentially expressed at  
343  $FDR \leq 0.05$ , and as such would not have been examined with greater interest had we only  
344 performed traditional differential expression analysis, which is the main analytic approach of  
345 virtually all studies of gene expression in asthma. [12-15, 40, 41]. Consistent with basic  
346 hypotheses underlying systems biology approaches, our study demonstrated that the asthma  
347 gene panel captures signal from differential expression as well as genes below traditional  
348 significance thresholds that may still have a contributory role to asthma classification. Only four  
349 of the 90 genes (complement component 3 (C3), defensin beta-1 (DEFB1), cytoplasmic FMR1  
350 interacting protein (CYFIP2) and glutathione S-transferase theta 1 (GSTT1)) were previously  
351 identified to be relevant to asthma by genetic association studies [28].

352         Our asthma gene panel has the potential to be developed into a minimally invasive  
353 biomarker to aid asthma diagnosis at clinical frontlines, where time and resources often  
354 preclude pulmonary function testing (PFT). Nasal brushing can be performed quickly, does not  
355 require machinery for collection, and implementation of our classification model yields a  
356 straightforward, binary result of asthma or no asthma. According to the Global Initiative for  
357 Asthma and US National Heart Lung Blood Institute, the diagnosis of asthma should be based  
358 on a history of typical symptoms *and objective findings* of variable expiratory airflow limitation by

359 PFT [6, 7]. Practically, however, objective measures are often not obtained. Patients with  
360 mild/moderate asthma are frequently asymptomatic at the time of exam. PFTs are often not  
361 done, with one study showing that over half of 465,866 patients over age 7 years with newly  
362 diagnosed asthma had no PFTs performed within a 3.5 year window surrounding diagnosis [8].  
363 Clinicians defer PFTs due to lack of equipment, time, and/or expertise to perform and interpret  
364 results [8, 9]. Diagnosing asthma based on history alone contributes to its under-diagnosis, as  
365 patients with asthma under-perceive and under-report their symptoms [11]. Misdiagnosis of  
366 asthma also occurs frequently given overlapping symptoms between asthma and other  
367 conditions [42]. Even if PFTs are obtained, spirometric abnormalities in mild/moderate  
368 asthmatics are not always present. An objective, accurate diagnostic classifier that is easy to  
369 obtain and interpret with minimal effort from the provider and patient could improve asthma  
370 diagnostic accuracy so that appropriate management can then be pursued.

371 Implementation of the asthma gene panel could involve clinicians brushing a patient's  
372 nose, placing the brush in a prepackaged tube, and submitting the sample for gene expression  
373 profiling targeted to the panel. Some platforms allow for direct transcriptional profiling of tissue  
374 without an RNA isolation step, avoiding inconveniences associated with direct RNA work [43,  
375 44] and yielding comparable results to RNAseq [45]. Bioinformatic interpretation of the output  
376 via the logistic regression-based classifier and classification threshold check could be  
377 automated, resulting in a determination of asthma or no asthma for the clinician to consider.  
378 Gene expression-based diagnostic classifiers are being successfully used in other disease  
379 areas, with prominent examples including the commercially available MammaPrint [46] and  
380 Oncotype DX [47] for diagnosing/predicting breast cancer phenotypes. These examples from  
381 the cancer field demonstrate an existing path for moving a diagnostic gene panel such as ours  
382 to clinical use.

383 Because it takes seconds for nasal brushing, an asthma gene panel such as ours may  
384 be attractive to time-strapped clinicians, particularly primary care providers at the frontlines of



385 asthma diagnosis. Asthma is frequently diagnosed and treated in the primary care setting [48]  
386 where access to PFTs is often not immediately available. Although PFTs yield results without  
387 specimen handling, these advantages do not seem to overcome its logistical limitations as  
388 evidenced by their low rate of real-life implementation [8, 9]. The direct costs of our panel are  
389 likely to be slightly higher than PFTs. Targeted profiling of our 90-gene panel currently costs  
390 about \$100 per sample, while PFTs cost about \$80 according to the Medicare Physician Fee  
391 Schedule [49]. However, gene expression profiling costs are likely to decrease [50], and  
392 implementation of the asthma gene panel could result in cost *savings* if it reduces the under-  
393 diagnosis and misdiagnosis of asthma [4]. Undiagnosed asthma leads to costly healthcare  
394 utilization worldwide [4], including in the United States, where asthma accounts for \$56 billion in  
395 medical costs, lost school and work days, and early deaths [51]. Clinical implementation of our  
396 asthma gene panel could identify undiagnosed asthma, leading to its appropriate management  
397 before high healthcare costs from unrecognized asthma are incurred. Given the panel's  
398 demonstrated specificity, use of our asthma gene panel could also reduce asthma misdiagnosis  
399 by correctly providing a determination of "no asthma" in non-asthmatic subjects with conditions  
400 often confused with asthma. Clinical benefit from gene-expression based classification has  
401 already been seen in the breast cancer field, where use of the 70-gene panel test MammaPrint  
402 to guide chemotherapy in a clinical trial leads to a lower 5-year rate of survival without  
403 metastasis compared to standard management [46].

404 We recognize that our asthma gene panel did not perform quite as well in the  
405 microarray-based vs. RNAseq-based asthma test sets, which was to be expected due to  
406 differences in study design and technological factors between RNAseq and microarray profiling.  
407 First, the baseline characteristics and phenotyping of the subjects differed. Subjects in the  
408 RNAseq test set were adults who were classified as mild/moderate asthmatic or healthy using  
409 the same strict criteria as the development set, which required subjects with asthma to have an  
410 objective measure of obstructive airway disease (i.e. positive methacholine challenge

411 response). In contrast, subjects in the Asthma1 microarray test set were all children (i.e. not  
412 adults) with nasal pathology, as entry criteria included dust mite allergic rhinitis specifically [30]  
413 (**Supplementary Table 3**). Subjects from the Asthma2 cohort were adults who were classified  
414 as having asthma or healthy based on history. As mentioned, the diagnosis of asthma based on  
415 history alone without objective lung function testing can be inaccurate [52]. The phenotypic  
416 differences between these test sets alone could explain differences in performance of our  
417 asthma gene panel in these test sets. Second, the differential performance may be due to the  
418 difference in profiling approach. Gene mappings do not perfectly correspond between RNAseq  
419 and microarray due to disparities between array annotations and RNAseq gene models [33].  
420 Compared to microarrays, RNAseq quantifies more RNA species and captures a wider range of  
421 signal [40]. Prior studies have shown that microarray-derived models can reliably predict  
422 phenotypes based on samples' RNAseq profiles, but the converse does not often hold [33].  
423 Despite the above limitations, our asthma gene panel performed with reasonable accuracy in  
424 classifying asthma in these independent microarray-based test sets. These results support a  
425 degree of generalizability of our panel to asthma populations that may be phenotyped or profiled  
426 differently.

427 An effective clinical classifier should have good positive and negative predictive value  
428 [53]. In our case, if an individual has asthma, the ideal classifier would reliably indicate asthma  
429 so that an accurate diagnosis is made, and if an individual does not have asthma, the ideal  
430 classifier would indicate “no asthma” so that misdiagnosis does not occur. This was indeed the  
431 case with our asthma gene panel, which achieved high positive and negative predictive values  
432 of 1.00 and 0.96 respectively in the RNAseq test set. We also tested our asthma gene panel on  
433 independent tests sets of subjects with allergic rhinitis, upper respiratory infection, cystic  
434 fibrosis, and smoking, and showed that the panel had a low to zero rate of misclassifying other  
435 respiratory conditions as asthma (**Figure 5**). These results were particularly notable for allergic  
436 rhinitis, a predominantly nasal condition. Although our panel is based on nasal gene expression,

437 and asthma and allergic rhinitis frequently co-occur [22], our panel did not misdiagnose allergic  
438 rhinitis as asthma. Although these conclusions are based on relatively small validation sets due  
439 to the scarcity of nasal gene expression data in the public domain, the strong performance of  
440 our panel gives hope that it will be generalizable and specific in other larger cohorts as well.

441 One of the current limitations of using RNAseq is the cost of processing large number of  
442 samples and generating large datasets. Although we have generated one of the largest nasal  
443 RNAseq data set in asthma to date, a future direction of this study is to recruit additional cohorts  
444 for nasal gene expression profiling and extend validation of our findings in a prospective  
445 manner, which will aid in the panel's path to clinical translation. This will also be facilitated by  
446 the rapidly falling costs of sequencing technologies [50], especially if done in a targeted manner.  
447 We recognize that our development set was from a single center and its baseline characteristics  
448 do not characterize all populations. For example, the development set consisted of adults, and  
449 our control subjects were largely Caucasian. However, variancePartition analysis demonstrated  
450 minimal contribution of age, race, and gender to gene expression variance in our data  
451 (**Supplementary Figure 1**). We also find it reassuring that the panel performed reasonably well  
452 in multiple external data sets spanning children and adults of varied racial distributions, and with  
453 asthma and other respiratory conditions defined by heterogeneous criteria. Subjects with  
454 asthma in our development cohort were not all symptomatic at the time of sampling. The fact  
455 that the performance of our asthma gene panel does not rely on symptomatic asthma is a  
456 strength, as many mild/moderate asthmatics are only sporadically symptomatic given the  
457 fluctuating nature of the disease.

458 We see our diagnostic nasal brush-based classifier of asthma as the first step in the  
459 development of nasal biomarkers for multiple aspects of asthma care. As with any disease, the  
460 first step is to accurately identify affected patients. The asthma gene panel described in this  
461 study provides an accurate path to this critical diagnostic step. With a correct diagnosis, an  
462 array of existing asthma treatment options can be considered [6]. A next phase of research will

463 be to develop a nasal biomarker to predict endotypes and treatment response, so that asthma  
464 treatment can be targeted, and even personalized, with greater efficiency and effectiveness  
465 [54].

466 In summary, we applied RNA sequencing and machine learning to identify a panel of  
467 genes expressed in nasal brushings that accurately classifies subjects with mild/moderate  
468 asthma from controls. This panel performed with accuracy across independent and external test  
469 sets, indicating reasonable generalizability across study populations and gene expression  
470 profiling modality, as well as specificity to asthma. Our asthma gene panel has the potential to  
471 be developed into a clinical biomarker to aid in asthma diagnosis, as it could be quickly obtained  
472 by simple nasal brush, does not require machinery for collection, and can be easily interpreted.  
473 Technical translation of panel implementation in the clinical environment, as well as prospective  
474 trials of its clinical effectiveness as a diagnostic asthma biomarker, are needed next. If further  
475 developed and applied to clinical practice, this nasal brush-based asthma gene panel could  
476 improve asthma detection and care.

477 **Materials and Methods**

478 *Study design and subjects*

479           Subjects with mild/moderate asthma were a subset of participants of the Childhood  
480 Asthma Management Program (CAMP), a multicenter North American study of 1041 subjects  
481 with mild to moderate persistent asthma [20, 21]. Findings from the CAMP cohort have defined  
482 current practice and guidelines for asthma care and research [21]. Asthma was defined by  
483 symptoms  $\geq 2$  times per week, use of an inhaled bronchodilator  $\geq$  twice weekly or use of daily  
484 medication for asthma, and increased airway responsiveness to methacholine ( $PC_{20} \leq 12.5$   
485 mg/ml). The subset of subjects included in this study were CAMP participants who presented for  
486 a visit between July 2011 and June 2012 at Brigham and Women's Hospital (Boston, MA), one  
487 of the eight study centers for CAMP.

488           Subjects with "no asthma" were recruited during the same time period by advertisement  
489 at Brigham & Women's Hospital. Selection criteria were no personal history of asthma, no family  
490 history of asthma in first-degree relatives, and self-described Caucasian ethnicity. Participation  
491 was limited to Caucasian individuals because a concurrent independent study was planned that  
492 would compare these same subjects to 968 Caucasian CAMP subjects who participated in the  
493 CAMP Genetics Ancillary study [55]. Subjects underwent pre- and post-bronchodilator  
494 spirometry according to American Thoracic Society guidelines. Only those meeting selection  
495 criteria and with demonstrated normal lung function without bronchodilator response were  
496 considered to have "no asthma."

497

498 *Nasal brushing and RNA sequencing*

499           Nasal brushing was performed with a cytology brush. Brushes were immediately placed  
500 in RNALater (ThermoFisher Scientific, Waltham, MA) and then stored at 40°C until RNA  
501 extraction. RNA extraction was performed with Qiagen RNeasy Mini Kit (Valencia, CA).

502 Samples were assessed for yield and quality using the 2100 Bioanalyzer (Agilent Technologies,  
503 Santa Clara, CA) and Qubit fluorometry (Thermo Fisher Scientific, Grand Island, NY).

504         Of the 190 subjects who underwent nasal brushing (66 with mild/moderate asthma, 124  
505 with no asthma), a random selection of 150 subjects were *a priori* assigned as the development  
506 set (for classification model development), with the 40 remaining subjects earmarked to serve  
507 as a test set of independent subjects (for testing the classification model). To minimize potential  
508 batch effects, all samples were submitted together for RNA sequencing (RNAseq). Staff at the  
509 Mount Sinai genomics core were blinded to the assignment of samples as development or test  
510 set. The sequencing library was prepared with the standard TruSeq RNA Sample Prep Kit v2  
511 protocol (Illumina). The mRNA libraries were sequenced on the Illumina HiSeq 2500 platform  
512 with a per-sample target of 40-50 million 100 bp paired-end reads. The data were put through  
513 Mount Sinai's standard mapping pipeline[56] (using Bowtie [57] and TopHat [58], and  
514 assembled into gene- and transcription-level summaries using Cufflinks [59]). Mapped data  
515 were subjected to quality control with FastQC and RNA-SeQC [60]. Data were pre-processed  
516 separately for the development and test sets to avoid leakage of information across the two data  
517 sets and maintain fairness of the machine learning procedures as much as possible. Genes with  
518 fewer than 100 counts in at least half the samples were dropped to reduce the potentially  
519 adverse effects of noise. DESeq2 [24] was used to normalize the data sets using its variance  
520 stabilizing transformation method.

521

#### 522 *VariancePartition Analysis of Potential Confounders*

523         Given differences in age, race, and sex distributions between the asthma and “no  
524 asthma” classes, we used the variancePartition method [23] to assess the degree to which  
525 these variables influenced gene expression and potentially confounded the target phenotype  
526 (asthma status). The total variance in gene expression was partitioned into the variance  
527 attributable to age, race, and sex using a linear mixed model implemented in variancePartition

528 v1.0.0 [23]. Age (continuous variable) was modeled as a fixed effect while race and sex  
529 (categorical variables) were modeled as random effects. The results showed that age, race, and  
530 sex accounted for minimal contributions to total gene expression variance (**Supplementary**  
531 **Figure 1**). Downstream analyses were therefore performed with gene expression data  
532 unadjusted for these variables.

533

#### 534 *Differential gene expression and pathway enrichment analysis*

535 DESeq2 [24] was used to identify differentially expressed genes in the development set.  
536 Genes with  $FDR \leq 0.05$  were deemed differentially expressed, with fold change  $< 1$  implying  
537 under-expression and vice versa. To identify the functions underlying these genes, pathway  
538 enrichment analysis was performed using the Gene Set Enrichment Analysis method applied to  
539 the Molecular Signature Database (MSigDB) [25].

540

#### 541 *Identification of the Asthma Gene Panel by Machine Learning Analyses of the RNAseq*

##### 542 *Development Set*

543 To identify gene expression-based classifiers that predict asthma status, we applied a  
544 rigorous machine learning pipeline implemented in Python using the scikit-learn package [61]  
545 that combined feature (gene) selection [16], classification [17], and statistical analyses of  
546 classification performance [18] to the development set (**Supplementary Figure 2**). Feature  
547 selection and classification were applied to a training set comprised of 120 randomly selected  
548 samples from the development set ( $n=150$ ) as described below. For an independent evaluation  
549 of the candidate classifiers generated from the training set by this process, they were then  
550 evaluated on the remaining 30 samples (holdout set). Finally, to reduce the dependence of the  
551 finally chosen classifier on a specific training-holdout split, this process was repeated 100 times  
552 on 100 random splits of the development set into training and holdout sets. The details of the  
553 overall process as well as the individual components are as follows.

554           *Feature selection:* The purpose of the feature selection component was to identify  
555 subsets of the full set of genes in the development set, whose expression profiles could be used  
556 to predict the asthma status as accurately as possible. The two main computations constituting  
557 this component were (i) the optimal number of features that should be selected, and (ii) the  
558 identification of this number of genes from the full gene set. To reduce the likelihood of  
559 overfitting when conducting both these computations on the entire training set, we used a 5x5  
560 nested (outer and inner) cross-validation (CV) setup [26] for selecting features from the training  
561 set (**Supplementary Figure 3**). The inner CV round was used to determine the optimal number  
562 of genes to be selected, and the outer CV round was used to select the set of predictive genes  
563 based on this number, thus separating the samples on which these decisions are made. The  
564 supervised Recursive Feature Elimination (RFE) algorithm [62] was executed on the inner CV  
565 training split to determine the optimal number of features. The use of RFE within this setting  
566 enabled us to identify groups of features that are collectively, but not necessarily individually,  
567 predictive. This reflects our systems biology-based expectation that many genes, even ones  
568 with marginal effects, can play a role in classifying diseases/phenotypes (here asthma) in  
569 combination with other more strongly predictive genes [19]. Specifically, we used the L2-  
570 regularized Logistic Regression (LR or Logistic) [63] and SVM-Linear (kernel) [64] classification  
571 algorithms in conjunction with RFE (combinations henceforth referred to as LR-RFE and SVM-  
572 RFE respectively). For this, for a given inner CV training split, all the features (genes) were  
573 ranked using the absolute values of the weights assigned to them by an inner classification  
574 model, trained using the LR or SVM algorithm, over this split. Next, for each of the conjunctions,  
575 the set of top-k ranked features, with k starting with 11587 (all filtered genes) and being reduced  
576 by 10% in each iteration until k=1, was considered. The discriminative strength of feature sets  
577 consisting of the top k features as per this ranking was assessed by evaluating the performance  
578 of the LR or SVM classifier based on them over all the inner CV training-test splits. The optimal  
579 number of features to be selected was determined as the value of k that produces the best



580 performance. Next, a ranking of features was derived from the outer CV training split using  
581 exactly the same procedure as applied to the inner CV training split. The optimal number of  
582 features determined above was selected from the top of this ranking to determine the optimal  
583 set of predictive features for this outer CV training split. Executing this process over all the five  
584 outer CV training splits created from the development set identified five such sets. Finally, the  
585 set of features (genes) that was common to all these sets (i.e. in their intersection/overlap),  
586 which is expected to yield a more robust feature set than the individual outer CV splits, was  
587 selected as the predictive gene set for this training set. One such set was identified for each of  
588 LR-RFE and SVM-RFE.

589 *Classification analyses:* Once predictive gene sets had been selected from feature  
590 selection, four global classification algorithms (L2-regularized Logistic Regression (LR or  
591 Logistic) [63], SVM-Linear [64], AdaBoost [65], and Random Forest (RF) [66]) were used to  
592 learn *intermediate classification models* over the training set. These intermediate models were  
593 then applied to the corresponding holdout set to generate probabilistic asthma predictions for  
594 the samples. An optimal threshold for converting these probabilistic predictions into binary ones  
595 (higher than threshold=asthma, lower than threshold=no asthma) was then computed as the  
596 threshold that yielded the highest classification performance on the holdout set. This  
597 optimization resulted in the *proposed classification models*.

598 *Statistical analyses of classification performance:* After the above components have  
599 been run on 100 training-holdout splits of the development set, we obtain 100 proposed  
600 classification models for each of eight feature selection-global classification combinations (two  
601 feature selection algorithms (LR-RFE and SVM-RFE) and four global classification algorithms  
602 Logistic, SVM-Linear, AdaBoost and RF). The next step of our pipeline was to determine the  
603 best performing combination. Instead of making this determination just based on the highest  
604 evaluation score, as is typically done in ML studies, we utilized this large population of models  
605 and their optimized holdout evaluation scores to conduct a statistical comparison to make this

606 determination. Specifically, we applied the Friedman test followed by the Nemenyi test [18, 67]  
607 to this population of modules and their evaluation scores. These tests, which account for  
608 multiple hypothesis testing, assessed the statistical significance of the relative difference of  
609 performance of the combinations in terms of their relative ranks across the 100 splits.

610 *Optimization for parsimony:* For an effective phenotype classifier, it is essential to  
611 consider parsimony in model selection (i.e. minimize number of features (i.e. genes)) to  
612 enhance its biological and clinical utility and acceptability. To enforce this for our classifier, an  
613 adapted performance measure, defined as the absolute performance measure (F-measure)  
614 divided by the number of genes in that model, was used for the above statistical comparison,  
615 i.e. as input to the Friedman-Nemenyi tests. In terms of this measure, a model that does not  
616 obtain the best performance measure among all models, but uses much fewer genes than the  
617 others, may be judged to be the best model. The result of the statistical comparison using this  
618 adapted measure was visualized as a Critical Difference plot [18] (**Supplementary Figure 4**),  
619 and enabled us to identify the best combination of feature selection and classification method as  
620 the left-most entry in this plot.

621 *Final model development:* The final step in our pipeline was to determine the  
622 representative model out of the 100 learned the above best combination by finding which of  
623 these models yielded the highest evaluation measure (F-measure). In case of ties among  
624 multiple candidates, the gene set that produced the best average asthma classification F-  
625 measure (**Box 1** and **Supplementary Figure 5**) across all four global classification algorithms  
626 was chosen as the gene set constituting the representative model for that combination. This  
627 analysis yielded the representative gene set, global classification algorithm, and the optimized  
628 asthma classification threshold. Finally, our asthma gene panel was built by training the global  
629 classification algorithm to the expression profiles of the representative gene set, and using the  
630 optimized threshold for classifying samples with and without asthma.

631

632 *Validation of the Asthma Gene Panel in an RNAseq test set of independent subjects*

633 The asthma gene panel identified by our machine learning pipeline was then tested on  
634 the RNAseq test set (n=40) to assess its performance in independent subjects. F-measure was  
635 used as the primary measure for classification performance, as described in **Box 1** and  
636 **Supplementary Figure 5**. AUC, PPV and NPV were additionally calculated for context.

637

638 *Performance Comparison to Alternative Classification Models*

639 For comparison, the same machine learning methodology was used to train and  
640 evaluate models from all combinations of feature selection and global classification methods  
641 considered in our pipeline. We also applied our machine learning pipeline with replacement of  
642 the feature (gene) selection step with these pre-determined gene sets: (1) all filtered RNAseq  
643 genes, (2) all differentially expressed genes, and (3) known asthma genes from a recent review  
644 of asthma genetics [28]. To maintain consistency with the machine learning pipeline-derived  
645 models, these were each used as a predetermined gene set that was run through the same  
646 pipeline (**Supplementary Figure 2** with the feature selection component turned off) to identify  
647 the best performing global classification algorithm and the optimal asthma classification  
648 threshold for this predetermined set of features. The algorithm and threshold were used to train  
649 each of these gene sets' representative classification model over the entire development set,  
650 and the resulting model for each of these gene sets was then evaluated on the RNAseq test set.  
651 Finally, as a baseline representative of alternative sparse classification algorithms, which  
652 represent a one-step option for doing feature selection and classification simultaneously, we  
653 also trained an L1-regularized logistic regression model (L1-Logistic) [29] on the development  
654 set and evaluated it on the RNAseq test set.

655

656 *Performance Comparison to Permutation-based Random Models*

657 To determine the extent to which the performance of all the above classification models  
658 could have been due to chance, we compared their performance with that of their random  
659 counterpart models (**Supplementary Figure 6, Supplementary Figure 7**). These counterparts  
660 were obtained by randomly permuting the labels of the samples in the development set and  
661 executing each of the above model training procedures on these randomized data sets in the  
662 same way as for the real development set. These random models were then applied to each of  
663 the test sets considered in our study, and their performances were also evaluated in terms of  
664 the same measures. For each of real models tested in our study, 100 corresponding random  
665 models were learned and evaluated as above, and the performance of the real models was  
666 compared with the average performance of the corresponding random models.

667

#### 668 *Validation of the asthma gene panel in external independent asthma cohorts*

669 To assess the generalizability of the asthma gene panel to other populations,  
670 microarray-profiled data sets of nasal gene expression from two external asthma cohorts--  
671 Asthma1 (GSE19187) [30] and Asthma2 (GSE46171) [31] (**Supplementary Table 3**)-- were  
672 obtained from NCBI Gene Expression Omnibus (GEO) [68]. The asthma gene panel was then  
673 applied and its performance evaluated on these external asthma cohorts..

674

#### 675 *Validation of the asthma gene panel in external cohorts with other respiratory conditions*

676 To assess the panel's ability to distinguish asthma from respiratory conditions that can  
677 have overlapping symptoms with asthma, i.e. its specificity to asthma, microarray-profiled data  
678 sets of nasal gene expression were also obtained for five external cohorts with allergic rhinitis  
679 (GSE43523) [36], upper respiratory infection (GSE46171) [31], cystic fibrosis (GSE40445) [37],  
680 and smoking (GSE8987) [12] (**Supplementary Table 4**). The asthma gene panel was then  
681 applied and its performance evaluated on these external cohorts with non-asthma respiratory  
682 conditions.

683 *Data availability*

684 Data and code for this study (doi:10.7303/syn9878922) are available via Synapse at  
685 <https://www.synapse.org/#!Synapse:syn9878922/files/>

686

687 **Declarations**

688 *Ethics approval and consent to participate:* The institutional review boards of Brigham &  
689 Women's Hospital and the Icahn School of Medicine at Mount Sinai approved the study  
690 protocols. Written informed consent was obtained from all subjects.

691

692 *Funding:* This study was supported by the US National Institutes of Health (NIH R01AI118833,  
693 K08AI093538, R01GM114434) and the Icahn Institute for Genomics and Multiscale Biology,  
694 including computational resources provided by Scientific Computing at the Icahn School of  
695 Medicine at Mount Sinai.

696

697 *Author contributions:* SB directed the study. SB, BAR, and EES designed the study. SB and  
698 AJR directed the recruitment of subjects and sample collection. BAR and STW provided  
699 guidance for access to subjects. EES advised on sequencing strategy. SB curated the clinical  
700 data. SB, GP, and OPP designed and performed the statistical and computational analyses. SB  
701 and GP wrote the manuscript. SB, GP, OPP, AJR, GEH, BAR, STW, and EES edited the  
702 manuscript. All authors contributed significantly to the work presented in this paper.

703

704 *Competing interests:* SB, GP, and EES have filed a patent application related to the findings of  
705 this manuscript. The remaining authors declare that they have no competing interests.

706

707 *Acknowledgments:* We thank Kathryn Paul, Laura Ting, Anne Plunkett, Nancy Madden, Ann  
708 Fuhlbrigge, Kelan Tantisira, Dan Cossette, Aimee Garciano, and Roxanne Kelly for their

709 assistance and support with recruitment, specimen collection, and sample processing. We thank

710 Robert Griffin and Ana Stanescu for critically reviewing the paper.

## References

1. **Current Asthma Prevalence Percents by Age, Sex, and Race/Ethnicity, United States, 2015. Asthma Surveillance Data.** *National Health Interview Survey, National Center for Health Statistics, Centers for Disease Control and Prevention* [www.cdc.gov/asthma/asthmadata.htm](http://www.cdc.gov/asthma/asthmadata.htm), downloaded 6/12/2017.
2. Fanta CH: **Asthma.** *N Engl J Med* 2009, **360**:1002-1014.
3. Yeatts K, Shy C, Sotir M, Music S, Herget C: **Health consequences for children with undiagnosed asthma-like symptoms.** *Arch Pediatr Adolesc Med* 2003, **157**:540-544.
4. Stempel DA, Spahn JD, Stanford RH, Rosenzweig JR, McLaughlin TP: **The economic impact of children dispensed asthma medications without an asthma diagnosis.** *J Pediatr* 2006, **148**:819-823.
5. Szeffler SJ, Wenzel S, Brown R, Erzurum SC, Fahy JV, Hamilton RG, Hunt JF, Kita H, Liu AH, Panettieri Jr RA, et al: **Asthma outcomes: Biomarkers.** *Journal of Allergy and Clinical Immunology* 2012, **129**:S9-S23.
6. Reddel HK, Bateman ED, Becker A, Boulet LP, Cruz AA, Drazen JM, Haahtela T, Hurd SS, Inoue H, de Jongste JC, et al: **A summary of the new GINA strategy: a roadmap to asthma control.** *Eur Respir J* 2015, **46**:622-639.
7. **Expert Panel Report 3: Guidelines for the Diagnosis and Management of Asthma.** Washington DC: National Heart Lung and Blood Institute and National Asthma Education and Prevention Program; 2007.
8. Gershon AS, Victor JC, Guan J, Aaron SD, To T: **Pulmonary function testing in the diagnosis of asthma: a population study.** *Chest* 2012, **141**:1190-1196.
9. Sokol KC, Sharma G, Lin YL, Goldblum RM: **Choosing wisely: adherence by physicians to recommended use of spirometry in the diagnosis and management of adult asthma.** *Am J Med* 2015, **128**:502-508.

10. Petsky HL, Cates CJ, Lasserson TJ, Li AM, Turner C, Kynaston JA, Chang AB: **A systematic review and meta-analysis: tailoring asthma treatment on eosinophilic markers (exhaled nitric oxide or sputum eosinophils).** *Thorax* 2012, **67**:199-208.
11. van Schayck CP, van Der Heijden FM, van Den Boom G, Tirimanna PR, van Herwaarden CL: **Underdiagnosis of asthma: is the doctor or the patient to blame? The DIMCA project.** *Thorax* 2000, **55**:562-565.
12. Sridhar S, Schembri F, Zeskind J, Shah V, Gustafson AM, Steiling K, Liu G, Dumas YM, Zhang X, Brody JS, et al: **Smoking-induced gene expression changes in the bronchial airway are reflected in nasal and buccal epithelium.** *BMC Genomics* 2008, **9**:259.
13. Wagener AH, Zwinderman AH, Luiten S, Fokkens WJ, Bel EH, Sterk PJ, van Drunen CM: **The impact of allergic rhinitis and asthma on human nasal and bronchial epithelial gene expression.** *PLoS One* 2013, **8**:e80257.
14. Guajardo JR, Schleifer KW, Daines MO, Ruddy RM, Aronow BJ, Wills-Karp M, Hershey GK: **Altered gene expression profiles in nasal respiratory epithelium reflect stable versus acute childhood asthma.** *J Allergy Clin Immunol* 2005, **115**:243-251.
15. Poole A, Urbanek C, Eng C, Schageman J, Jacobson S, O'Connor BP, Galanter JM, Gignoux CR, Roth LA, Kumar R, et al: **Dissecting childhood asthma with nasal transcriptomics distinguishes subphenotypes of disease.** *J Allergy Clin Immunol* 2014, **133**:670-678 e612.
16. Saeys Y, Inza I, Larranaga P: **A review of feature selection techniques in bioinformatics.** *Bioinformatics* 2007, **23**:2507-2517.
17. Witten IH, Frank E, Hall MA: *Data mining : practical machine learning tools and techniques.* 3rd edn. Burlington, MA: Morgan Kaufmann; 2011.
18. Demsar J: **Statistical Comparisons of Classifiers over Multiple Data Sets.** *J Mach Learn Res* 2006, **7**:1-30.



19. Schadt EE, Friend SH, Shaywitz DA: **A network view of disease and compound screening.** *Nat Rev Drug Discov* 2009, **8**:286-295.
20. **The Childhood Asthma Management Program (CAMP): design, rationale, and methods.** Childhood Asthma Management Program Research Group. *Control Clin Trials* 1999, **20**:91-120.
21. Covar RA, Fuhlbrigge AL, Williams P, Kelly HW, the Childhood Asthma Management Program Research G: **The Childhood Asthma Management Program (CAMP): Contributions to the Understanding of Therapy and the Natural History of Childhood Asthma.** *Curr Respir Care Rep* 2012, **1**:243-250.
22. Egan M, Bunyavanich S: **Allergic rhinitis: the "Ghost Diagnosis" in patients with asthma.** *Asthma Research and Practie* 2015, **1**:DOI: 10.1186/s40733-40015-40008-40730.
23. Hoffman GE, Schadt EE: **variancePartition: Quantifying and interpreting drivers of variation in complex gene expression studies.** *bioRxiv* 2016:doi: <http://dx.doi.org/10.1101/040170>.
24. Love MI, Huber W, Anders S: **Moderated estimation of fold change and dispersion for RNA-seq data with DESeq2.** *Genome Biol* 2014, **15**:550.
25. Subramanian A, Tamayo P, Mootha VK, Mukherjee S, Ebert BL, Gillette MA, Paulovich A, Pomeroy SL, Golub TR, Lander ES, Mesirov JP: **Gene set enrichment analysis: a knowledge-based approach for interpreting genome-wide expression profiles.** *Proc Natl Acad Sci U S A* 2005, **102**:15545-15550.
26. Whalen S, Pandey OP, Pandey G: **Predicting protein function and other biomedical characteristics with heterogeneous ensembles.** *Methods* 2016, **93**:92-102.
27. Lever J, Krzywinski M, Altman N: **Points of Significance: Classification Evaluation.** *Nature Methods* 2016, **13**:603-604.

28. Mathias RA: **Introduction to genetics and genomics in asthma: genetics of asthma.** *Adv Exp Med Biol* 2014, **795**:125-155.
29. Vidaurre D, Bielza C, Larrañaga P: **A Survey of L1 Regression.** *International Statistical Review* 2013, **81**:361-387.
30. Giovannini-Chami L, Marcet B, Moreilhon C, Chevalier B, Illie MI, Lebrigand K, Robbe-Sermesant K, Bourrier T, Michiels JF, Mari B, et al: **Distinct epithelial gene expression phenotypes in childhood respiratory allergy.** *Eur Respir J* 2012, **39**:1197-1205.
31. McErlean P, Berdnikovs S, Favoreto S, Jr., Shen J, Biyasheva A, Barbeau R, Easley C, Barczak A, Ward T, Schleimer RP, et al: **Asthmatics with exacerbation during acute respiratory illness exhibit unique transcriptional signatures within the nasal mucosa.** *Genome Med* 2014, **6**:1.
32. Zhang W, Yu Y, Hertwig F, Thierry-Mieg J, Zhang W, Thierry-Mieg D, Wang J, Furlanello C, Devanarayan V, Cheng J, et al: **Comparison of RNA-seq and microarray-based models for clinical endpoint prediction.** *Genome Biol* 2015, **16**:133.
33. Su Z, Fang H, Hong H, Shi L, Zhang W, Zhang W, Zhang Y, Dong Z, Lancashire LJ, Bessarabova M, et al: **An investigation of biomarkers derived from legacy microarray data for their utility in the RNA-seq era.** *Genome Biol* 2014, **15**:523.
34. Venet D, Dumont JE, Detours V: **Most Random Gene Expression Signatures Are Significantly Associated with Breast Cancer Outcome.** *PLoS computational biology* 2011, **7**:e1002240.
35. Chibon F: **Cancer gene expression signatures - the rise and fall?** *Eur J Cancer* 2013, **49**:2000-2009.
36. Imoto Y, Tokunaga T, Matsumoto Y, Hamada Y, Ono M, Yamada T, Ito Y, Arinami T, Okano M, Noguchi E, Fujieda S: **Cystatin SN upregulation in patients with seasonal allergic rhinitis.** *PLoS One* 2013, **8**:e67057.

37. Clarke LA, Sousa L, Barreto C, Amaral MD: **Changes in transcriptome of native nasal epithelium expressing F508del-CFTR and intersecting data from comparable studies.** *Respir Res* 2013, **14**:38.
38. Oliver BG, Robinson P, Peters M, Black J: **Viral infections and asthma: an inflammatory interface?** *Eur Respir J* 2014, **44**:1666-1681.
39. Cowling BJ, Chan KH, Fang VJ, Lau LL, So HC, Fung RO, Ma ES, Kwong AS, Chan CW, Tsui WW, et al: **Comparative epidemiology of pandemic and seasonal influenza A in households.** *N Engl J Med* 2010, **362**:2175-2184.
40. Bunyavanich S, Schadt EE: **Systems biology of asthma and allergic diseases: A multiscale approach.** *J Allergy Clin Immunol* 2014.
41. Sordillo J, Raby BA: **Gene expression profiling in asthma.** *Adv Exp Med Biol* 2014, **795**:157-181.
42. Scott S, Currie J, Albert P, Calverley P, Wilding JP: **Risk of misdiagnosis, health-related quality of life, and BMI in patients who are overweight with doctor-diagnosed asthma.** *Chest* 2012, **141**:616-624.
43. Kulkarni MM: **Digital multiplexed gene expression analysis using the NanoString nCounter system.** *Curr Protoc Mol Biol* 2011, **Chapter 25**:Unit25B 10.
44. Veldman-Jones MH, Brant R, Rooney C, Geh C, Emery H, Harbron CG, Wappett M, Sharpe A, Dymond M, Barrett JC, et al: **Evaluating Robustness and Sensitivity of the NanoString Technologies nCounter Platform to Enable Multiplexed Gene Expression Analysis of Clinical Samples.** *Cancer Res* 2015, **75**:2587-2593.
45. Leong HS, Galletta L, Etemadmoghadam D, George J, Australian Ovarian Cancer S, Kobel M, Ramus SJ, Bowtell D: **Efficient molecular subtype classification of high-grade serous ovarian cancer.** *J Pathol* 2015, **236**:272-277.

46. Cardoso F, van't Veer LJ, Bogaerts J, Slaets L, Viale G, Delalogue S, Pierga JY, Brain E, Causeret S, DeLorenzi M, et al: **70-Gene Signature as an Aid to Treatment Decisions in Early-Stage Breast Cancer.** *N Engl J Med* 2016, **375**:717-729.
47. Paik S, Shak S, Tang G, Kim C, Baker J, Cronin M, Baehner FL, Walker MG, Watson D, Park T, et al: **A multigene assay to predict recurrence of tamoxifen-treated, node-negative breast cancer.** *N Engl J Med* 2004, **351**:2817-2826.
48. Wechsler ME: **Managing asthma in primary care: putting new guideline recommendations into context.** *Mayo Clin Proc* 2009, **84**:707-717.
49. **Physician Fee Schedule Search.** *Centers for Medicare & Medicaid Services*, available at <https://www.cms.gov/apps/physician-fee-schedule/search/search-criteria.aspx> and accessed on 1/30/2017 2016.
50. Goodwin S, McPherson JD, McCombie WR: **Coming of age: ten years of next-generation sequencing technologies.** *Nat Rev Genet* 2016, **17**:333-351.
51. **Asthma in the US.** *Centers for Disease Control and Prevention VitalSigns* <http://www.cdc.gov/vitalsigns/asthma/>, downloaded 1/30/2017 2011.
52. Jain VV, Allison DR, Andrews S, Mejia J, Mills PK, Peterson MW: **Misdiagnosis Among Frequent Exacerbators of Clinically Diagnosed Asthma and COPD in Absence of Confirmation of Airflow Obstruction.** *Lung* 2015, **193**:505-512.
53. Brower V: **Biomarkers: Portents of malignancy.** *Nature* 2011, **471**:S19-21.
54. Muraro A, Lemanske RF, Jr., Hellings PW, Akdis CA, Bieber T, Casale TB, Jutel M, Ong PY, Poulsen LK, Schmid-Grendelmeier P, et al: **Precision medicine in patients with allergic diseases: Airway diseases and atopic dermatitis-PRACTALL document of the European Academy of Allergy and Clinical Immunology and the American Academy of Allergy, Asthma & Immunology.** *J Allergy Clin Immunol* 2016, **137**:1347-1358.

55. Himes BE, Hunninghake GM, Baurley JW, Rafaels NM, Sleiman P, Strachan DP, Wilk JB, Willis-Owen SA, Klanderman B, Lasky-Su J, et al: **Genome-wide association analysis identifies PDE4D as an asthma-susceptibility gene.** *Am J Hum Genet* 2009, **84**:581-593.
56. Fromer M, Roussos P, Sieberts SK, Johnson JS, Kavanagh DH, Perumal TM, Ruderfer DM, Oh EC, Topol A, Shah HR, et al: **Gene expression elucidates functional impact of polygenic risk for schizophrenia.** *Nat Neurosci* 2016.
57. Langmead B, Trapnell C, Pop M, Salzberg SL: **Ultrafast and memory-efficient alignment of short DNA sequences to the human genome.** *Genome Biol* 2009, **10**:R25.
58. Trapnell C, Pachter L, Salzberg SL: **TopHat: discovering splice junctions with RNA-Seq.** *Bioinformatics* 2009, **25**:1105-1111.
59. Trapnell C, Williams BA, Pertea G, Mortazavi A, Kwan G, van Baren MJ, Salzberg SL, Wold BJ, Pachter L: **Transcript assembly and quantification by RNA-Seq reveals unannotated transcripts and isoform switching during cell differentiation.** *Nat Biotechnol* 2010, **28**:511-515.
60. DeLuca DS, Levin JZ, Sivachenko A, Fennell T, Nazaire MD, Williams C, Reich M, Winckler W, Getz G: **RNA-SeQC: RNA-seq metrics for quality control and process optimization.** *Bioinformatics* 2012, **28**:1530-1532.
61. Pedregosa F, Varoquaux Ge, Gramfort A, Michel V, Thirion B, others: **Scikit-learn: Machine Learning in Python.** *Journal of Machine Learning Research* 2011, **12**:2825-2830.
62. Guyon I, Weston, J, Barnhill, S, Vapnik, V: **Gene selection for cancer classification using support vector machines.** *Machine Learning* 2002, **46**:389-422.
63. Bewick V, Cheek L, Ball J: **Statistics review 14: Logistic regression.** *Crit Care* 2005, **9**:112-118.

64. Burges CJ: **A tutorial on support vector machines for pattern recognition.** *Data mining and knowledge discovery* 1998, **2**:121-167.
65. Freund Y, Schapire RE: **A Decision-Theoretic Generalization of On-Line Learning and an Application to Boosting.** *J Comput Syst Sci* 1997, **55**:119-139.
66. Breiman L: **Random Forests.** *Machine Learning* 2001, **45**:5-32.
67. Hollander M, Wolfe DA, Chicken E: *Nonparametric statistical methods.* John Wiley & Sons; 2013.
68. Barrett T, Wilhite SE, Ledoux P, Evangelista C, Kim IF, Tomashevsky M, Marshall KA, Phillippy KH, Sherman PM, Holko M, et al: **NCBI GEO: archive for functional genomics data sets--update.** *Nucleic Acids Res* 2013, **41**:D991-995.

## Figure Legends

**Figure 1: Study flow for the identification of a nasal brush-based classifier of asthma by machine learning analysis of RNAseq data.** Subjects with mild/moderate asthma and controls without asthma were recruited for phenotyping, nasal brushing, and RNA sequencing of nasal brushings. The RNAseq data generated were then *a priori* split into development and test sets. The development set was used for differential expression analysis and machine learning (involving feature selection, classification, and statistical analyses of classification performance) to identify an asthma gene panel that can accurately classify asthma from no asthma. The asthma gene panel was then tested on eight validation test sets, including (1) the RNAseq test set of independent subjects with and without asthma, (2) two external test sets of subjects with and without asthma with nasal gene expression profiled by microarray, and (3) five external test sets of subjects with non-asthma respiratory conditions (allergic rhinitis, upper respiratory infection, cystic fibrosis, and smoking) and nasal gene expression profiled by microarray.

**Figure 2: Receiver operating characteristic (ROC) curve of the predictions generated by applying the asthma gene panel to the samples in the RNAseq test set of independent subjects (n=40).** The ROC curve for a random model is shown for reference. The curve and its corresponding AUC score show that the panel performs well for both asthma and no asthma (control) samples in this test set.

**Figure 3: Validation of the asthma gene panel on test sets of independent subjects with asthma.** Performance of the asthma panel in classifying asthma (A) and no asthma (C) in terms of F-measure, a conservative mean of precision and sensitivity. F-measure ranges from 0 to 1, with higher values indicating superior classification performance. The panel was applied to an RNAseq test set of independent subjects with and without asthma, and two external microarray

data sets from subjects with and without asthma (Asthma1 and Asthma2). Positive (B) and negative (D) predictive values are also provided for context.

**Figure 4: Comparative performance of the asthma gene panel and other classification**

**models in the RNAseq test set.** Performances of the asthma gene panel and other classification models in classifying asthma (left panel) and no asthma (right panel) are shown in terms of F-measure, with individual measures shown in the bars. The number of genes in each model is shown in parentheses within the bars. The asthma gene panel is labeled in red and classification models learned from the machine learning pipeline using other combinations of feature selection and classification are labeled in black. These other classification models were combinations of two feature selection algorithms (LR-RFE and SVM-RFE) and four global classification algorithms (Logistic Regression, SVM-Linear, AdaBoost and Random Forest). For context, alternative classification models (labeled in blue) are also shown and include: (1) a model derived from an alternative, single-step classification approach (sparse classification model learned using the L1-Logistic regression algorithm), and (2) models substituting feature selection with each of the following preselected gene sets - all genes after filtering, all differentially expressed genes in the development set, and known asthma genes [28] - with their respective best performing global classification algorithms. These results show the superior performance of the asthma gene panel compared to all other models, in terms of classification performance and model parsimony (number of genes included). LR = Logistic Regression. SVM = Support Vector Machine. RFE = Recursive Feature Elimination. RF = Random Forest.

**Figure 5: Validation of the asthma gene panel on test sets of independent subjects with**

**non-asthma respiratory conditions.** Performance statistics of the panel when applied to external microarray-generated data sets of nasal gene expression derived from case/control cohorts with non-asthma respiratory conditions. Performance is shown in terms of F measure (A



and C), a conservative mean of precision and sensitivity, as well as positive (B) and negative predictive values (D). The panel had a low to zero rate of misclassifying other respiratory conditions as asthma, supporting that the panel is specific to asthma and would not misclassify other respiratory conditions as asthma.

**Figure 6: Heatmap showing expression profiles of the 90 gene members of the asthma gene panel.** Columns shaded pink at the top denote asthma samples, while samples from subjects without asthma are denoted by columns shaded grey. 22 and 24 of these genes were over- and under-expressed in asthma samples (DESeq2 FDR  $\leq 0.05$ ), denoted by orange and purple groups of rows, respectively. The four genes in this set that have been previously associated with asthma [28] are marked in blue. The panel's inclusion of genes not previously known to be associated with asthma as well as genes not differentially expressed in asthma (beige group of rows) demonstrates the ability of our machine learning methodology to move beyond traditional analyses of differential expression and current domain knowledge.

**Table 1: Baseline characteristics of subjects in the RNAseq development and test sets**

|                                 | Development set |               |                  | Test Set    |               |                  | Development vs. Test Set P value <sup>B</sup> |
|---------------------------------|-----------------|---------------|------------------|-------------|---------------|------------------|-----------------------------------------------|
|                                 | All (n=150)     | Asthma (n=53) | No Asthma (n=97) | All (n=40)  | Asthma (n=13) | No Asthma (n=27) |                                               |
| Age: years                      | 26.9 (5.4)      | 25.7 (2.0)    | 27.6 (6.5)       | 26.2 (5.1)  | 25.3 (2.1)    | 26.6 (6.1)       | 0.47                                          |
| Sex: female                     | 89 (59.3%)      | 24 (45.3%)    | 65 (67.0%)       | 21 (52.5%)  | 2 (15.3%)     | 19 (70.4%)       | 0.40                                          |
| Race                            |                 |               |                  |             |               |                  | 0.60                                          |
| Caucasian                       | 116 (77.3%)     | 21 (40.4%)    | 96 (99.0%)       | 32 (80.0%)  | 5 (38.5%)     | 27 (100.0%)      |                                               |
| African American                | 24 (16.0%)      | 23 (43.4%)    | 1 (1.0%)         | 5 (12.5%)   | 5 (38.5%)     | 0 (0.0%)         |                                               |
| Latino                          | 5 (3.3%)        | 5 (9.4%)      | 0 (0.0%)         | 3 (7.5%)    | 3 (23.1%)     | 0 (0.0%)         |                                               |
| Other                           | 5 (3.3%)        | 4 (7.5%)      | 0 (0.0%)         | 0 (0.0%)    | 0 (0.0%)      | 0 (0.0%)         |                                               |
| FEV1 <sup>A</sup> : % predicted | 94.7 (10.0)     | 94.6% (10.9)  | 94.8 (9.7)       | 94.5 (11.4) | 94.4 (12.0)   | 94.6 (11.3)      | 0.90                                          |
| FEV1/FVC <sup>A</sup> : %       | 82.5 (6.4)      | 81.5 (6.7)    | 83.1 (6.3)       | 82.7 (5.5)  | 84.8 (4.4)    | 81.6 (5.8)       | 0.91                                          |
| Bronchodilator response: %      | 5.6 (6.0)       | 8.7 (6.4)     | 3.9 (5.1)        | 4.5 (5.4)   | 7.0 (6.1)     | 3.3 (4.7)        | 0.29                                          |
| Age asthma onset: years         |                 | 3.2 (2.7)     | n/a              |             | 3.4 (2.0)     |                  | 0.78                                          |
| Allergic rhinitis               | 60 (40.0%)      | 29 (54.7%)    | 31 (32.0%)       | 7 (17.5%)   | 7 (53.8%)     | 0 (0.0%)         | 0.009                                         |
| Nasal steroids                  | 14 (9.3%)       | 9 (17.0%)     | 5 (5.2%)         | 0 (0.0%)    | 0 (0.0%)      | 0 (0.0%)         | 0.07                                          |
| Smoking                         | 7 (4.7%)        | 1 (1.9%)      | 6 (6.2%)         | 1 (2.5%)    | 0 (0.0%)      | 1 (3.7%)         | 1.0                                           |

Mean (SD) or Number (%) provided

<sup>A</sup>pre-bronchodilator measures. FEV1 = forced expiratory flow volume in 1 second, FVC = forced vital capacity

<sup>B</sup>Fisher's Exact test for categorical variables and t-test for continuous variables

## Supplementary Materials

**Supplementary Figure 1:** variancePartition analysis of the RNAseq development set.

**Supplementary Figure 2:** Visual description of the machine learning pipeline used to select predictive features (genes) and develop classification models based on them in the RNAseq development set.

**Supplementary Figure 3:** Visual description of the feature (gene) selection component of the machine learning pipeline.

**Supplementary Figure 4:** Critical Difference plots demonstrating results of the statistical comparison of the performance of 100 asthma classification models obtained by various combinations of feature selection and global classification algorithms in terms of the classification performance and parsimony (numbers of genes included) of the models.

**Supplementary Figure 5:** Evaluation measures for classification models.

**Supplementary Figure 6:** Performance of permutation-based random classification models in test sets of independent subjects with asthma and controls.

**Supplementary Figure 7:** Performance of permutation-based random classification models in test sets of independent subjects with non-asthma respiratory conditions and controls.

**Supplementary Figure 8:** Distribution of DESeq2 FDR values of differential expression in the asthma gene panel (blue bars) vs. other genes in the RNAseq development set (coral bars).

**Supplementary Table 1:** Lists of over- and under-expressed genes and pathways in asthma cases compared to controls (in different tabs of this file). Differentially expressed genes were identified using DESeq2 [24] applied to the development set, and enriched pathways were identified from the Molecular Signature Database [25], both using an upper FDR threshold of 0.05.

**Supplementary Table 2:** List of known asthma-associated genes from a recent review of asthma genetics [28] that overlap with genes in our RNAseq data sets.

**Supplementary Table 3:** Characteristics of the external asthma cohorts used in the validation of the asthma gene panel.

**Supplementary Table 4:** Characteristics of the external cohorts with non-asthma respiratory conditions and controls used in the validation of the asthma gene panel.

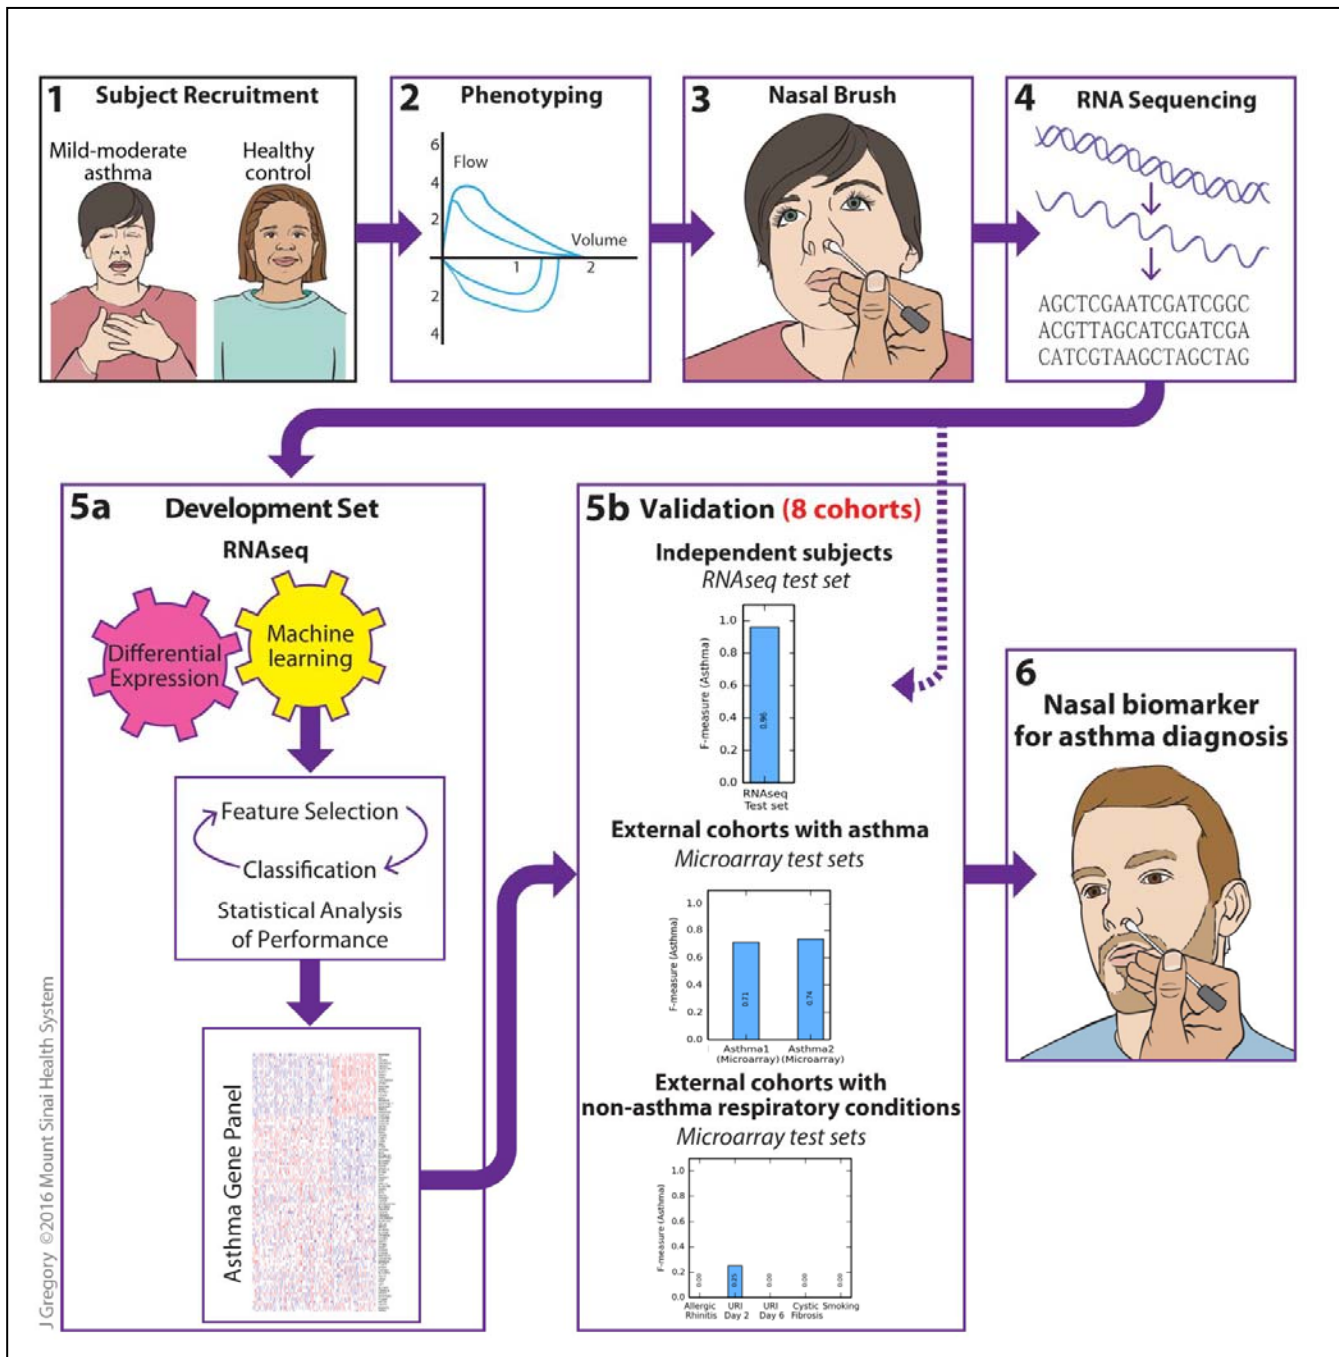

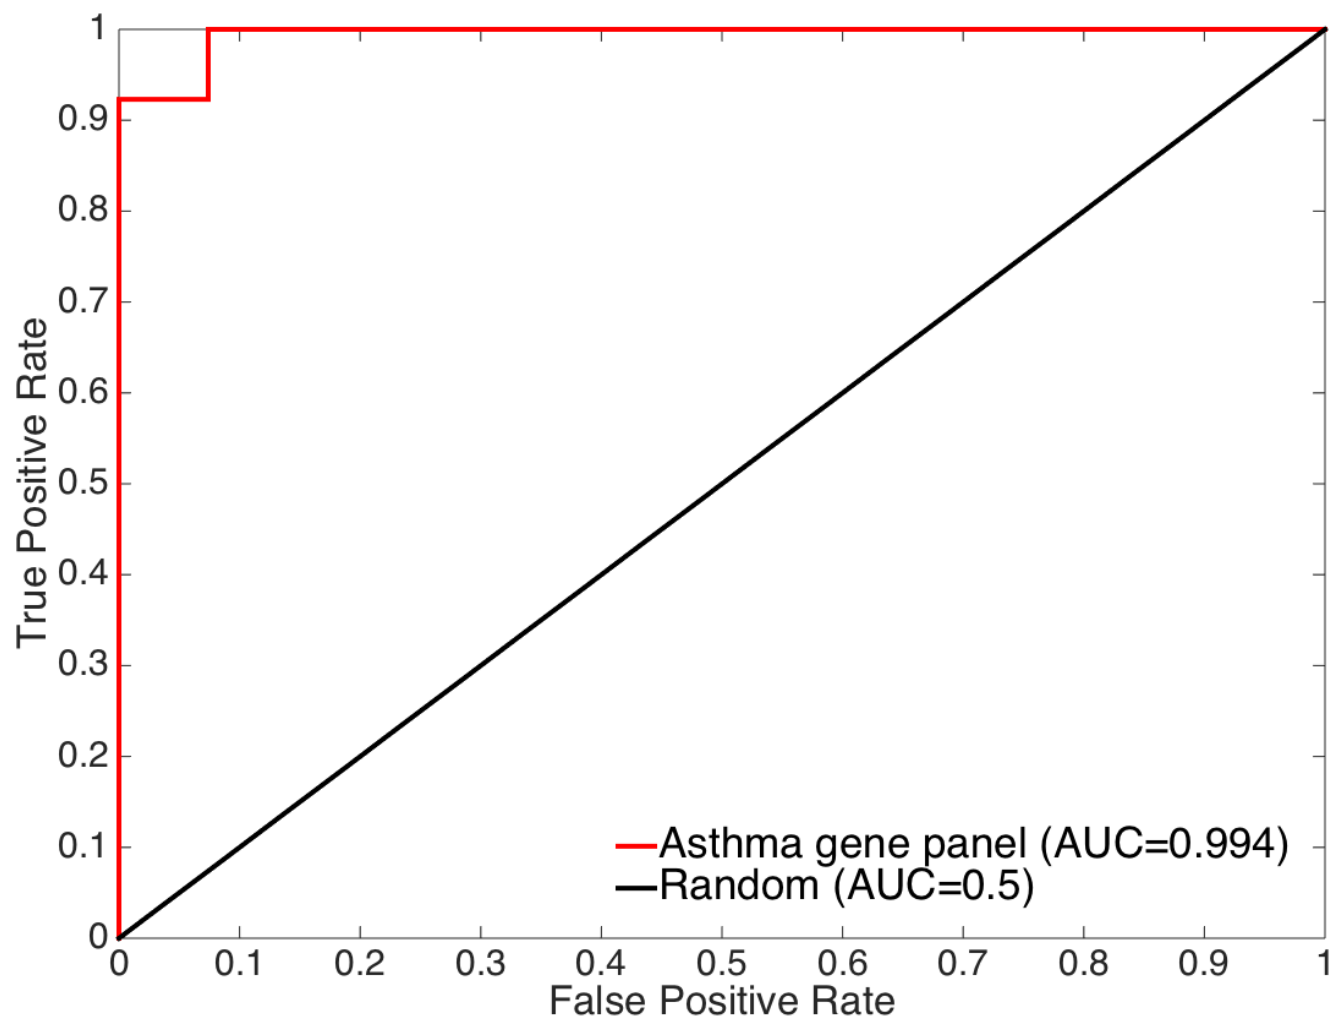

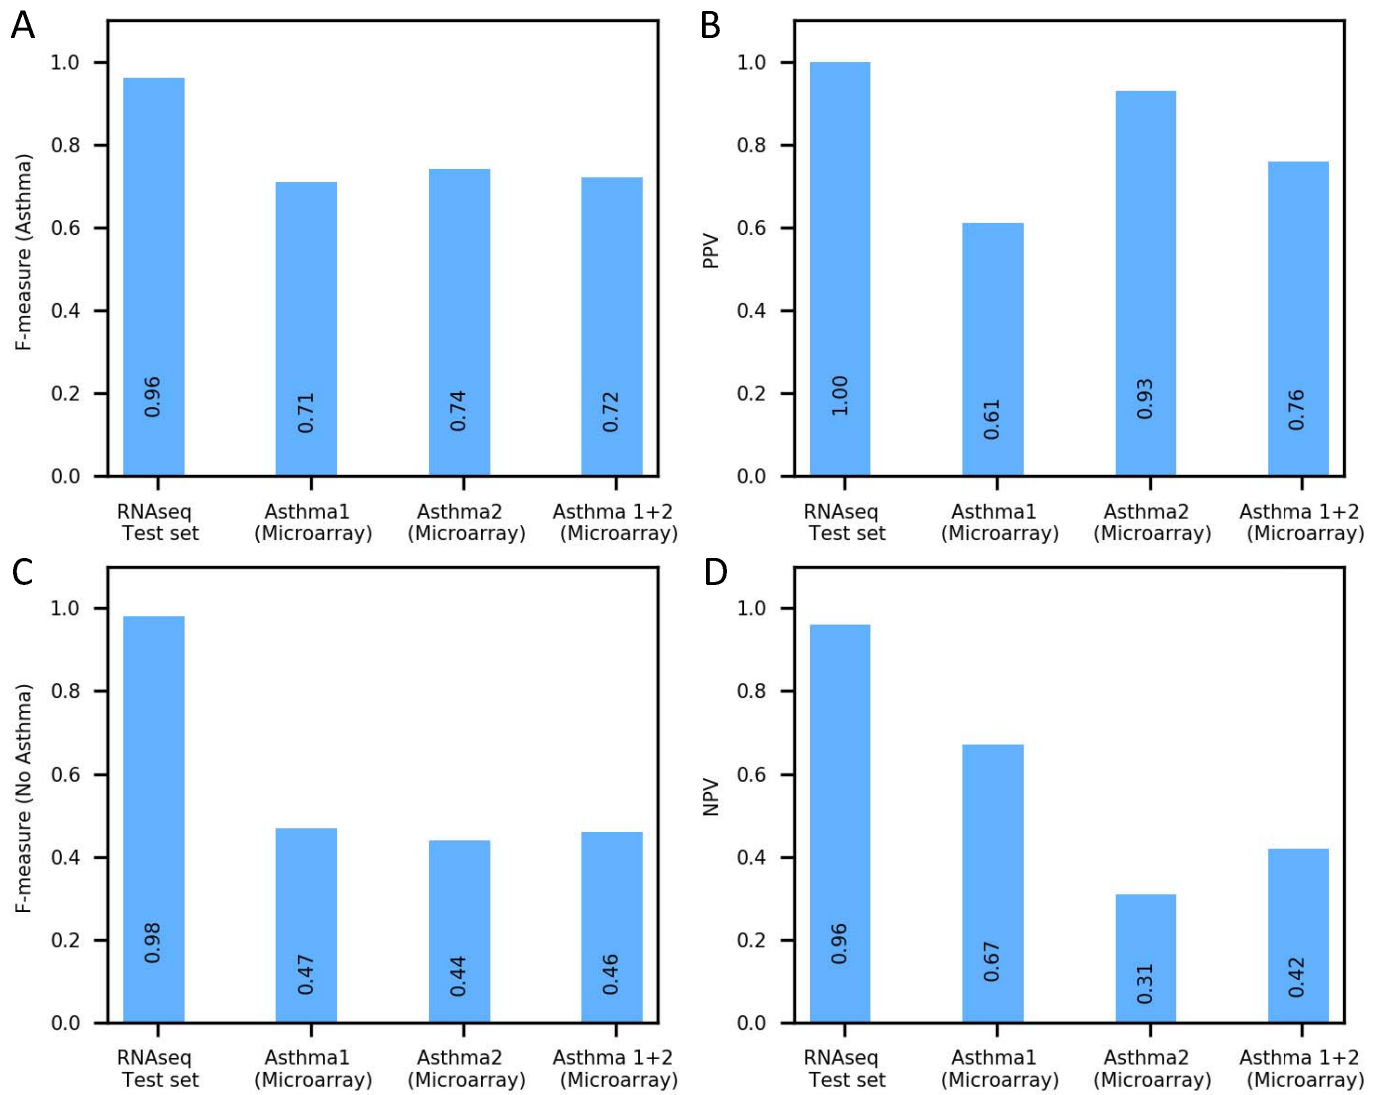

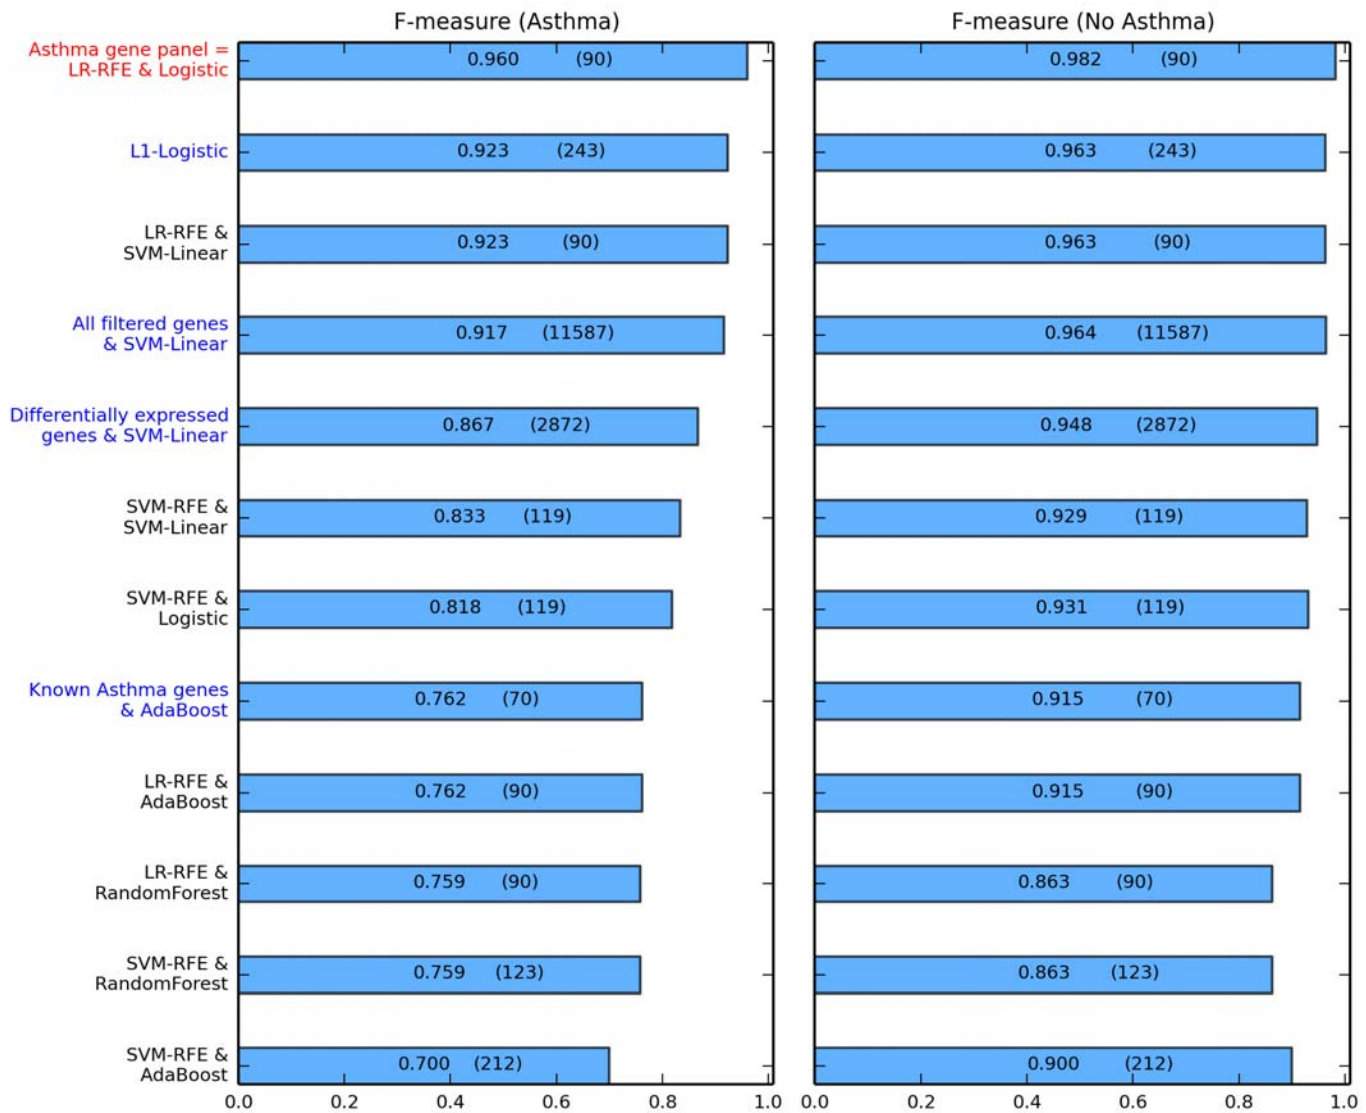

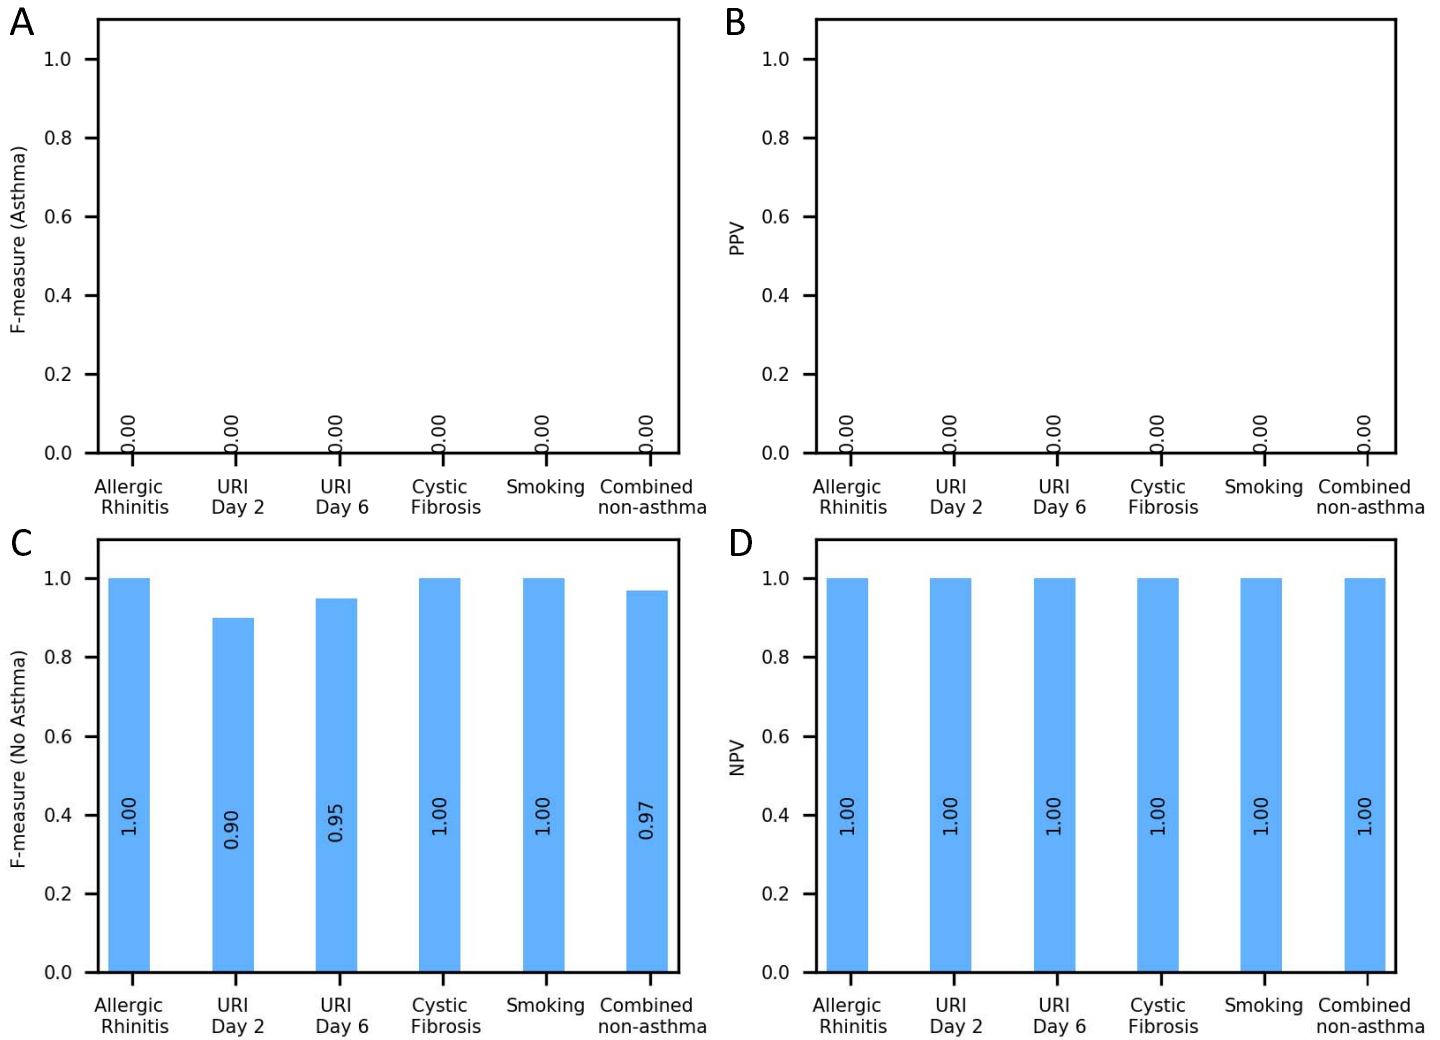



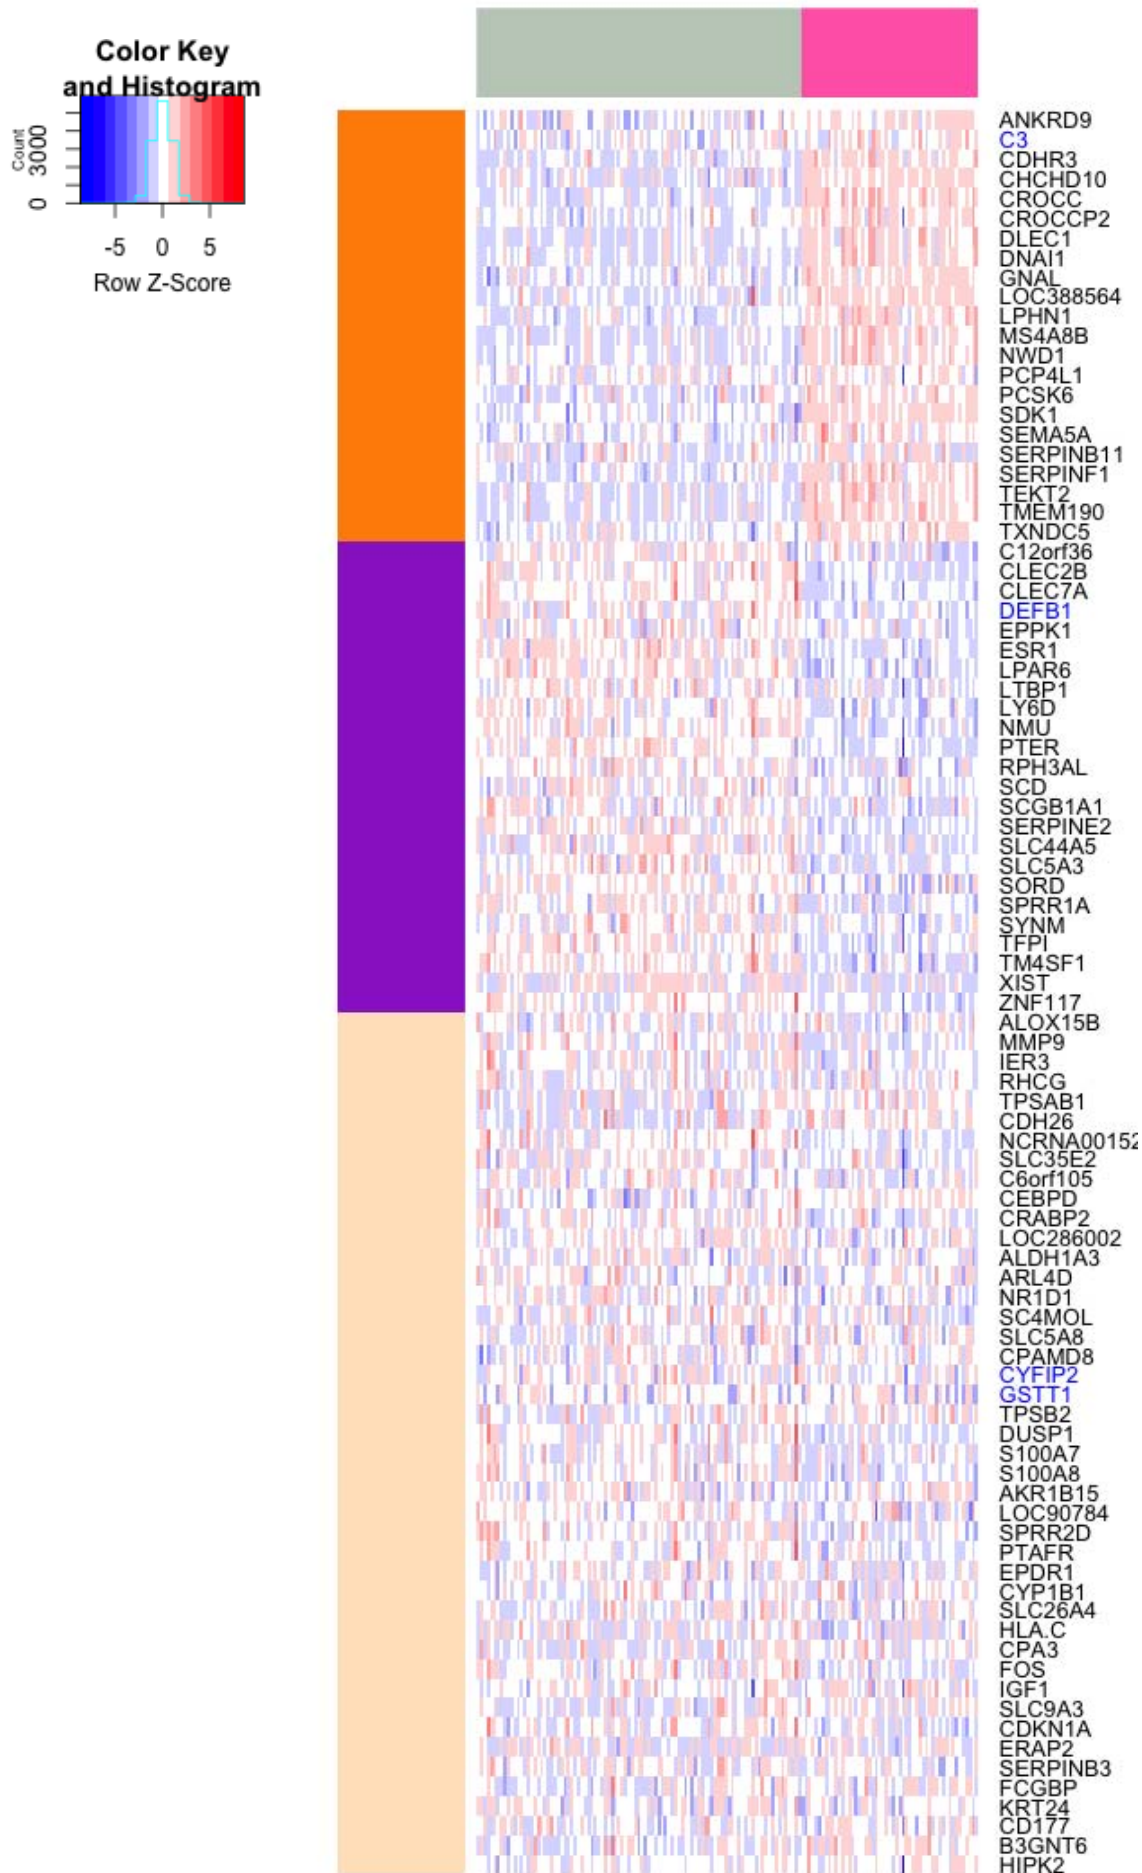

Source: http://www.biorxiv.org/content/10.1101/145771v2.full.pdf
